# **KDM4A promotes NEPC progression through regulation of MYC expression**

Celia Sze Ling Mak<sup>1</sup>, Ming Zhu<sup>1</sup>, Xin Liang<sup>1</sup>, Feng Wang<sup>2</sup>, Anh G Hoang<sup>1</sup>, Xinzhi Song<sup>2</sup>, Peter Shepherd<sup>1</sup>, Derek Liang<sup>1</sup>, Jiwon Park<sup>1</sup>, Miao Zhang<sup>3</sup>, Eric Metzger<sup>4</sup>, Roland Schüle<sup>4</sup>, Abhinav K. Jain<sup>5</sup>, Min Gyu Lee<sup>6</sup>, Paul Corn<sup>1</sup>, Christopher J. Logothetis<sup>1</sup>, Ana Aparicio<sup>1</sup>, Nora Navone<sup>1</sup>, Patricia Troncoso<sup>3</sup>, Jianhua Zhang<sup>2</sup>, Sue-Hwa Lin<sup>1,7</sup>, Guocan Wang<sup>1</sup>

<sup>1</sup>Department of Genitourinary Medical Oncology and the David H. Koch Center for Applied Research of Genitourinary Cancers, <sup>2</sup>Department of Genomic Medicine, <sup>3</sup>Department of Pathology, <sup>3</sup>Department of Pathology, The University of Texas MD Anderson Cancer Center, Houston, Texas, USA. <sup>4</sup>Klinik für Urologie und Zentrale Klinische Forschung, Klinikum der Albert-Ludwigs-Universität Freiburg, Germany. <sup>5</sup>Department of Epigenetics and Molecular Carcinogenesis, <sup>6</sup>Department of Molecular and Cellular Oncology, <sup>7</sup>Department of Translational Molecular Pathology, The University of Texas MD Anderson Cancer Center, Houston, Texas, USA.

Correspondence: Guocan Wang (gwang6@mdanderson.org)

Running title: The role of KDM4A in NEPC

Key words: KDM4A, histone lysine demethylase, neuroendocrine prostate cancer

Conflict of interest: C. J. Logothetis reports receiving commercial research grants from Bayer, Sanofi, Janssen, Astellas Pharma, Pfizer; and honoraria from Bayer, Janssen, Sanofi, Astellas Pharma. No potential conflicts of interest were disclosed by the other authors.

# ABSTRACT

Despite advancement in treatment, prostate cancer (PCa) remains the second leading cause of death among men. Neuroendocrine prostate cancer (NEPC) represents one of the most lethal forms of PCa and lacks life-prolonging treatment. Here we identified histone lysine demethylase KDM4A as a driver in NEPC progression and an effective therapeutic target. We found that KDM4A mRNA and protein are overexpressed in human and mouse NEPC compared to adenocarcinoma. Also, we showed that knockdown or knockout of KDM4A in NEPC cell lines suppressed cancer cell growth *in vitro* and *in vivo*. Importantly, inactivation of *Kdm4a* in a genetically engineered mouse model of prostate cancer led to reduced tumor burden, reduced incidence of NEPC, and prolonged overall survival. Mechanistically, we found that *KDM4A* KD led to suppression of MYC signaling through direct transcriptional regulation of *MYC*. Importantly, MYC signaling is hyper-activated in human and mouse NEPC. Furthermore, a potent pan-KDM4 inhibitor QC6352 significantly reduced NEPC cell growth *in vitro* and *in vivo*. Taken together, we demonstrated that KDM4A drives NEPC progression through regulation of MYC and targeting KDM4A can potentially be an effective therapeutic strategy for NEPC.

# INTRODUCTION

Neuroendocrine prostate cancer (NEPC) is a highly lethal subtype of castration-resistant prostate cancer (CRPC) with a median survival of seven months after initial diagnosis,<sup>1-3</sup> as compared to a median survival of 13 to 31 months in castration-resistant prostate adenocarcinoma, the more common subtype of CRPC.<sup>4</sup> NEPC is characterized by attenuated androgen receptor (AR) signaling, the expression of neuroendocrine lineage markers (e.g., synaptophysin), uncontrolled hyperproliferation, and widespread metastasis (bone, liver, and lung). De novo NEPCs are rare (2%-5%); the majority arise as a mechanism of resistance from prostate adenocarcinoma treated with potent AR pathway inhibitors (ARPIs).<sup>5</sup> The widespread use of ARPIs in non-metastatic CRPC and hormone-sensitive metastatic tumors has led to an increase in the incidence NEPC. Due to the lack of life-prolonging systemic therapies, there is an *urgent need* to better understand the mechanisms underlying the pathogenesis of NEPC.

Recent evidence suggests that epigenetic dysregulation is a hallmark of NEPC.<sup>5</sup> Aberrantly expressed transcription factors (TFs) and regulators of DNA methylation and histone modification were found in NEPC preclinical models and patients.<sup>5</sup> Extensive studies have led to the discovery of key regulators driving the transition from adenocarcinoma to NEPC.<sup>5</sup> Among these epigenetic aberrations, histone lysine methylation, which is balanced by writers (histone lysine methyltransferase [KMT]) and erasers (histone lysine demethylases [KDM]), plays an important role in development and cancer, including prostate.<sup>6</sup> Multiple lysine methylation modifiers (e.g., EZH2, WHSC1, DOT1L, LSD1/KDM1A, KDM4A, KDM4B)<sup>7-11</sup> have been implicated in prostate cancer progression. However, their roles in NEPC are just started to emerge. For example, EZH2 has been recently implicated as a key player in NEPC.<sup>5,12-17</sup>

Whether KDMs play any role in NEPC progression is unknown.

KDM4A regulates cell cycle, replication, and DNA damage response in cancers and has been found to be amplified or overexpressed in multiple cancer types, including breast, lung, and prostate.<sup>18</sup> In prostate cancer, KDM4A overexpression (OE) is not sufficient to drive the formation of prostate adenocarcinoma in a GEMM.<sup>19</sup> However, KDM4A cooperates with loss of tumor suppressor PTEN and OE of oncogenic ETV1 to enhance the development of primary prostate cancer. Although OE or shRNA KD of KDM4A affects prostate cancer cell proliferation,<sup>19</sup> whether KDM4A plays a role in NEPC is unknown. Here we identified histone lysine demethylase KDM4A as a potential driver of NEPC progression and establish alternative epigenetic pathways driving NEPC progression. We also showed that KDM4A is a promising therapeutic target, which will contribute to therapies to treat NEPC.

## RESULTS

### **KDM4A is overexpressed in neuroendocrine prostate cancer (NEPC)**

To examine whether histone lysine demethylases play a role in NEPC, we analyzed a well-annotated RNA-seq dataset,<sup>20</sup> which includes five pathologically defined subtypes based on a proposed classification approach:<sup>21</sup> adenocarcinoma (n=34), NEPC (n=7), mixed NEPC-adenocarcinoma (N=2), small cell prostate carcinoma (SCPC) (n=4), and mixed SCPC-adenocarcinoma (n=2). Due to the small sample size of the non-adenocarcinoma samples, we combined NEPC and mixed NEPC-adenocarcinoma as one group (NEPC), and SCPC and mixed SCPC-adenocarcinoma as another group (SCPC). We compared the genome-wide gene expression of NEPC (NEPC and mixed NEPC-adenocarcinoma) to adenocarcinoma and SCPC (SCPC and mixed SCPC-adenocarcinoma), respectively, to identify differentially expressed

genes (DEGs). We identified 4669 and 1834 upregulated genes in NEPC compared to adenocarcinoma and SCPC, respectively (**Supple. Table 1-2**). Also, we identified 1525 and 33 downregulated genes in NEPC compared to adenocarcinoma and SCPC, respectively (**Supple. Table 1-2**). KDM4A and KDM5D were uniquely upregulated in NEPC compared to adeno-CRPC and SCPC among the histone lysine demethylases (**Figure 1A-B**). Because KDM4A, but not KDM5D<sup>22</sup>, was shown to play an oncogenic role in prostate adenocarcinoma,<sup>19</sup> we decided to focus on the functions of KDM4A in NEPC progression. To determine whether KDM4A mRNA is also upregulated in mouse NEPC, we took advantage of a publicly available RNA-seq dataset from Pb-Cre+;Pten<sup>f/f</sup>;NMYC/NMYC, Rb1<sup>f/f</sup> NEPC model (referred to as **PNR** hereafter), we found that KDM4A, but not KDM5D, is upregulated in advanced tumors from older mice (16 weeks) compared to tumors from younger mice (12-13 weeks) (**Figure 1C**), suggesting KDM4A overexpression may play a role in NEPC progression. Also, KDM4A is overexpressed in the more aggressive NEPC from PNR mice compared to Pb-Cre+;Pten<sup>f/f</sup>;NMYC/NMYC (**PN**) and Pb-Cre+;Pten<sup>f/f</sup>;NMC/+;Rb1<sup>f/+</sup> (**PN<sup>het</sup> R<sup>het</sup>**) with comparable age (16-17 weeks) (**Figure 1C**), which develop prostate adenocarcinoma.

To confirm the findings from the human and mouse RNA-seq data, we performed IHC staining of KDM4A in human and mouse primary CRPC-ado and NEPC. We found that KDM4A is overexpressed in human NEPC but not adeno-CRPC (**Figure 1D**). Also, we examined KDM4A protein expression in a well characterized prostate cancer patient-derived xenografts (PDX) tissue microarray (TMA).<sup>23</sup> We found that KDM4A protein is overexpressed in NEPC PDXs compared to adenocarcinoma PDXs (**Figure 1E**). To determine the expression of KDM4A protein in murine NEPC, we examined its expression in three genetically engineered mouse models (GEMMs) that generate NEPC including: TRAMP<sup>24</sup>, prostate specific conditional

knockout of *Pten/Trp53/Rb1* (PTR),<sup>13</sup> and a recently generated prostate specific cKO of *Pten/Smad4/Trp53/Rb1* (PSTR). We found that KDM4A protein is highly expressed in the primary tumors from all three NEPC GEMMs compared to two well-established prostate adenocarcinoma models, i.e., the prostate specific cKO of *Pten* and *Pten/Smad4* (PS model) (**Figure 1F & Suppl. Figure 1A**), consistent with our findings in human prostate tumor tissues. Of note, the specificity of KDM4A antibodies was validated using *Kdm4a*-KO cells using cell lines derived from PSTR primary tumors (**Suppl. Figure 1B**). We also determined whether KDM4A overexpression is associated with neuroendocrine markers. Using the Beltran et al. RNA-seq dataset,<sup>20</sup> we observed a strong positive correlation between *KDM4A* mRNA and multiple neuroendocrine (NE) markers, including *CHGA*, *CHGB*, *ENO2*, and *DLL3* (**Figure 1G & Suppl. Figure 1C**). We also examined the expression of KDM4A in the Abida et al. RNA-seq data set,<sup>25</sup> which also contains a small subset of NEPC. We found that *KDM4A* mRNA is significantly higher in mCRPC tumor samples with neuroendocrine features compared to those without NE features (**Suppl. Figure 1D**). Collectively, our data strongly suggested that KDM4A may play a role in NEPC progression.

### **KDM4A KD and KO impaired the growth of mouse NEPC proliferation *in vitro***

To examine the functions of KDM4A in NEPC progression, we used shRNA and siRNA to generate KDM4A knockdown (KD) and knockout (KO) cells. Mouse prostate cancer cell lines derived from PSTR and PTR primary tumors, which were confirmed to have upregulated expression of NE markers such as *Ncam1*, *Chga*, *Syp*, *Foxa2*, *Prox1*, and *Sox2* compared to Myc-CaP adenocarcinoma using qRT-PCR (**Suppl. Figure 2A-B**), were used in this study. We confirmed the efficient KD of *Kdm4a* using Western blot in PSTR cells (**Figure 2A**). Given the

highly proliferative nature of NEPC cells, we first examined whether KDM4A is required for the proliferation of NEPC cell lines using *Kdm4a*-KD cells and control cells. We found that *Kdm4a* KD using shRNA or siRNA significantly reduced cell proliferation in PSTR cells as shown by foci-formation assay (**Figure 2B & Suppl. Figure 2C**). *Kdm4a* KD in PTR cells also reduced cell proliferation (**Figure 2C-D**). To confirm the findings using shRNA, we also used CRISPR/Cas9 system to generate *Kdm4a* KO and control PSTR cells. We confirmed the complete KO of *Kdm4a* using Western blot (**Figure 2E**). We found that *Kdm4a* KO in PSTR cells dramatically reduced cell proliferation (**Figure 2F**). To determine the effect of KDM4A KD on human NEPC cells, we generated KDM4A KD and control human NEPC cells using the 144-13 and LASCPC-01 models (**Figure 2G & Suppl. Figure 2D**). Human NEPC cell line 144-13 was derived from a NEPC PDX MDA PCa 144-13)<sup>26</sup> and LASCPC-01 was derived from Myr-AKT/N-MYC transformed PCa.<sup>16</sup> We found that *KDM4A* KD in 144-13 and LASCPC-1 cells also significantly reduced cell proliferation (**Figure 2H & Suppl. Figure 2E**), consistent with the findings using mouse cell lines. Together, our data suggest that KDM4A is required the growth of NEPC cells *in vitro*.

We also tested the impact of *KDM4A* KD and KO in NEPC cells on the anchorage independence growth, an assay that measured the tumorigenicity of cancer cells *in vitro*, using soft agar colony formation assay. We found that *KDM4A* KD in 144-13 cells led to reduced colony number and size compared to control siRNA (**Figure 2I**). Similar results were observed in PSTR *Kdm4a*-KO cells (**Figure 2J**). Together, our data suggest that KDM4A is required the growth of NEPC cells *in vitro*.

***Kdm4a* KO or KD impairs NEPC progression *in vivo*.**

To examine the effect of *Kdm4a* KO on the NEPC cell growth *in vivo*, we implanted *Kdm4a*-KO PSTR cells and control cells subcutaneously in nude mice. We found that *Kdm4a* KO significantly reduced the tumor growth *in vivo* (**Figure 3A**). To further establish the role of KDM4A in NEPC progression *in vivo*, we crossed the *Kdm4a*<sup>loxP/loxP</sup> mice<sup>27</sup> to Probasin-Cre4 transgenic mice to generate the prostate-specific *Kdm4a* KO mice, which were further crossed with TRAMP mice in C57BL/6 background, a well characterized prostate cancer model that recapitulate the multi-stage tumor progression in prostate cancer patients and develop both prostate adenocarcinoma and neuroendocrine prostate cancer.<sup>24,28-31</sup> Since the tumor progression in the TRAMP mice is affected by the copy number of the transgene (tg), we generated TRAMP<sup>tg/tg</sup> homozygous and Pb-Cre;Kdm4a<sup>loxP/loxP</sup>;TTRAMP<sup>tg/tg</sup> compound mutant mice (aka **KT** mice) for comparison. We confirmed the loss of KDM4A protein expression by IHC staining in the KT mice (**Figure 3B**). We found that *Kdm4a* KO reduced the tumor weight in age matched KT and TRAMP mice (**Figure 3C**). We found that prostate tumors from KT mice were largely PIN with focal invasion whereas the prostate tumors from age-matched TRAMP mice are largely invasive (**Figure 3D**). Also, *Kdm4a* KO led to a significant increase in overall survival in KT mice compared to TRAMP mice (**Figure 3E**). To characterize the impact of *Kdm4a* KO on the cancer cell proliferation *in vivo*, we performed IHC staining of Ki67 in tumors from age-matched TRAMP and KT mice. We found that *Kdm4a*-deficient tumors have reduced Ki67 staining (**Figure 3F-G**). We observed that a subset of TRAMP mice developed aggressive tumors that required euthanasia before 30-week-old (**Figure 3E**). The majority of these prostate tumors (9 out of 10) displayed a NEPC-predominant phenotype as shown by IHC staining of SYP (**Figure 3H-I**). For TRAMP mice die after 30-week-old, most of these prostate tumors (7 out of 8) displayed an adenocarcinoma-predominant phenotype (**Figure 3H-I**). These findings are



consistent with previous reports that TRAMP mice develop both NEPC and prostate adenocarcinoma and the aggressive nature of NEPC. In contrast, only 1 out of 16 KT mice rarely required euthanasia due to big tumor burden before 30-week-old and most of KT mice died around 40-41 weeks (**Figure 3H**). For KT mice died after 30-week-old, the majority of these prostate tumors (10 out of 11) displayed an adenocarcinoma-predominant phenotype (**Figure 3H-I**). Collectively, our data suggest that KDM4A plays an important role in NEPC progression *in vivo*.

### **KDM4A regulates MYC expression to promote tumor progression in NEPC cells.**

To determine the mechanisms by which KDM4A promotes NEPC progression, we performed RNA-seq of *Kdm4a*-KD and -control PTR cells. We identified 1359 genes that are downregulated and 2608 genes that are upregulated in *Kdm4a*-KD cells compared to control PTR cells ( $FDR \leq 0.05$ , fold change  $\geq 1.5$ ) (**Suppl. Table 3**). We performed gene set enrichment analysis (GSEA) to identify pathway that are activated or suppressed in *Kdm4a* KD cells. We found that *Kdm4a* KD led to reduced activation of E2F signaling (**Suppl. Figure 3A**), which is consistent with previous findings that KDM4A interacts with E2F1 to regulates transcription.<sup>32</sup> Interestingly, we identified MYC signatures (HALLMARK MYC TARGETS V1 and HALLMARK MYC TARGETS V2) as the top downregulated pathways in *Kdm4a* KD cells (**Figure 4A & Suppl. Table 5**). Multiple MYC target genes (e.g., *Ldha*, *Nme1*, and *Srsf2*, etc.) were significantly downregulated in *Kdm4a*-KD cells (**Figure 4B**). Interestingly, MYC has been implicated to play a functional role in NEPC, as overexpression of MYC, AKT1, BCL2, or RB1-KD/p53-KD transformed normal prostate epithelial cells into NEPC.<sup>33</sup> We also found that MYC is the top hallmark pathways activated in both human and mouse NEPC as shown by GSEA

analyses of publicly available RNA-seq data of adenocarcinoma and NEPC from patients<sup>20</sup> and mice<sup>13</sup> (**Figure 4C-D**). These data suggest that KDM4A may promote NEPC progression through regulation of MYC signaling.

To further delineate the mechanisms by which KDM4A regulates MYC signaling, we first determined whether KDM4A directly regulates MYC transcription, given the well characterized function of KDM4A in epigenetic regulation. We performed qRT-PCR and Western blot analyses to examine the effect of *KDM4A* KD on MYC expression in PSTR, PTR, and 144-13 cell lines. We found that *KDM4A* KD reduced *MYC* mRNA and protein expression in all three cell lines (**Figure 4E-G & Suppl. Figure 3B**). To determine whether MYC is a direct target gene of KDM4A, we performed ChIP-seq in 144-13 cells using anti-KDM4A, anti-H3K9me3, anti-H3K36me3, anti-H3K27ac, and anti-CTCF. We found that KDM4A binds directly to MYC promoter as shown by ChIP-seq analysis (**Figure 4H**), suggesting an active MYC transcription in NEPC cells. We also found that H3K9me3 is barely detectable at MYC locus whereas H3K36me3 and H3K27ac were present at MYC locus (**Figure 4H**), suggesting active transcription at MYC locus. As a positive control for anti-H3K9me3, ZNF114, ZNF333, ZNF175, genes that are constitutively silent due to the large H3K9me3 domain, showed significant H3K9me3 signal at its promoter region (**Suppl. Figure 3C-E**). Lastly, we determined the effect of MYC KD or MYC inhibitor MYCi975 on NEPC cell proliferation in 144-13 cells. We found that MYC KD or MYC inhibitor MYCi975 significantly reduced cell proliferation in 144-13 (**Fig. 4I-J**). Collectively, our data suggest that KDM4A promotes NEPC progression through direct regulation of MYC transcription.

**KDM4 inhibitor suppressed cell proliferation and induced apoptosis in NEPC *in vitro***

Because our genetic data showed that KDM4A plays an important role in NEPC progression, we examined whether targeting KDM4A can be an effective therapeutic strategy for NEPC. Although there are no KDM4A-specific inhibitors, several pan-KDM4 inhibitors (KDM4i) [e.g., QC6352,<sup>34,35</sup> NSC636819,<sup>36</sup> NCGC00244536,<sup>37</sup> IOX1,<sup>38</sup> SD70<sup>39</sup>] have been shown to suppress the growth of cancer cells. For example, QC6352 was shown to suppress the growth of colorectal cancer (CRC) and triple negative breast cancer (TNBC) and NCGC00244536 was shown to suppress the growth of prostate cancer cell lines PC3 and LNCaP. Among them, QC6352 is a highly selective inhibitor against the KDM4 family and rigorously characterized (e.g., cocrystal structure with KDM4A) with potent anti-tumor activities, favorable pharmacokinetics, and low toxicity in mice.<sup>34,35</sup> We found that treatment of PSTR cells with QC6352 resulted in a significant increase in global level of H3K9me3 and H3K36me3 expression, two of KDM4's substrates (**Figure 5A**). We then examined the effect of QC6352 on the growth of PSTR cells *in vitro*, which are largely resistant to AR inhibitor enzalutamide (ENZ) (**Suppl. Figure 4A**). We found that QC6352 treatment led to a dramatic decrease in cell proliferation in a dose-dependent manner (**Figure 5B**). QC6352 also induced apoptosis in PSTR cells as shown by Western blot analysis for cleaved caspase 3 and cleaved PARP1 (**Figure 5C**) and positivity of green fluorescent signal from IncuCyte Caspase-3/7 Green Apoptosis Assay Reagent (**Figure 5D**). Similarly, QC6352 treatment also dramatically suppressed cell proliferation and induced apoptosis in PTR cells (**Figure 5E-F**) and human NEPC cell lines (144-13) (**Figure 5G & Suppl. Figure 4B**). Similarly, NCGC00244536, another potent inhibitor for KDM4 histone lysine demethylase,<sup>37</sup> also suppressed cell proliferation and induced apoptosis in PSTR and 144-13 cells (**Figure 5G & Suppl. Figure 4C**). In addition, we compared the response of *Kdm4a*-WT and -KO PSTR cells to QC6352 treatment. We found that KDM4A KO

largely abrogated the response of PSTR to QC6352 (**Figure 5H**), supporting the notion that KDM4A is the critical target of QC6352 in NEPC cells. We also found that MYC mRNA and protein expression were downregulated in QC6352-treated NEPC cells compared to control cells (**Suppl. Figure 4D**), consistent with the role of KDM4A in regulating MYC expression.

### **KDM4 inhibitor suppressed NEPC progression *in vivo***

To determine whether QC6352 could suppress NEPC growth *in vivo*, we treated mice bearing PSTR tumors and 144-13 tumors subcutaneously in immune-deficient mice. We found that QC6352 treatment dramatically suppressed the growth of PSTR cells (**Figure 6A-B**) and 144-13 cells (**Figure 6C-D**), as shown by reduced tumor sizes and tumor weights. To ensure QC6352 has similar effects on tumor progression in immune-competent host, we treated PSTR GEMM with QC6352. Similarly, QC6352 treatment in PSTR GEMM model led to a significant reduction in tumor burden as shown by tumor weights (**Figure 6E**). We then examined the effects of QC6352 treatment on tumor cell proliferation. We found that QC6352 treatment led to a significantly reduced proliferation in PSTR GEMM as shown by Ki67 IHC staining (**Figure 6F**). We did not observe noticeable toxicity as shown by measurement of peripheral blood count and measurement of weight of major organs (**Suppl. Figure 5A-B**), consistent with the findings in the original study.<sup>34</sup> Together, our data suggest that KDM4 inhibitor QC6352 can significantly delay NEPC progression *in vivo*.

## **DISCUSSIONS**

Neuroendocrine prostate cancer (NEPC) has been increasingly observed in clinic, and most of these NEPC occurs in patients who develop therapeutic resistance to potent androgen pathway

inhibitors. Despite a high response rate to platinum-based chemotherapy that is of transient nature, there are no life-prolonging therapeutic options for NEPC patients. In recent years, epigenetic dysregulation has emerged as a hallmark for NEPC and targeting epigenetic regulators has become a promising approach. Here we identified KDM4A as an important regulator of NEPC progression and demonstrated that targeting KDM4A can be a promising therapeutic approach.

KDM4A is an epigenetic modifier and its dysregulation may alter the expression of many genes. Our findings that KDM4A regulates MYC expression in NEPC provides a novel mechanism for how KDM4A exerts its effects on prostate cancer progression. MYC has previously been shown to be a key player of prostate cancer progression and prostate specific expression of MYC was sufficient to induce prostate cancer and promote tumor progression in mouse models.<sup>40-42</sup> Our study reveals a mechanism by which Myc is activated and Myc plays a role in NEPC, providing a novel insight into how epigenetic modifier regulates oncogene expression. This novel finding also promoted us to examine whether such regulation occurs in other cancer types. We analyzed a publicly available RNA-seq datasets<sup>43</sup> and found *Myc* mRNA was downregulated in mouse squamous cell carcinoma cell lines upon *Kdm4a* KO compared to control cells (**Suppl. Figure 6A**). Also, QC632 treatment led to reduced expression of MYC mRNA in triple negative breast cancer (TNBC)<sup>35</sup> (**Suppl. Figure 6A**). Furthermore, we also examined a publicly available ChIP-seq dataset (KDM4A) in TNBC<sup>35</sup> and found that KDM4A binds to MYC promoter/gene body in TNBC (**Suppl. Figure 6B**). These findings suggest that the regulation of MYC expression by KDM4A may also contribute to tumor progression in other cancer types with KDM4A overexpression.

Using genetically engineered mouse models (GEMMs), we demonstrated that *Kdm4a* KO

significantly reduced the incidence of NEPC that are present in the TRAMP mice and extended the overall survival. Since the expression of Cre recombinase is driven by Probasin promoter that starts at puberty (~ 4-6 weeks), Cre-dependent *Kdm4a* KO occurred during the tumor initiation phase. Thus, we could not rule out that the KDM4A is also necessary for tumor initiation and that in part contributes to the effects of *Kdm4a* KO on tumor progression and survival observed in KT mice. Future experiments using transgenic mouse expressing inducible Cre controlled by tamoxifen or doxycycline to inactivate *Kdm4a* at various stages of prostate cancer progression are needed to address the roles of KDM4A in tumor initiation and progression.

We showed that KDM4 inhibitor QC6352 not only suppresses cell proliferation, but also induces apoptosis in NEPC cells. However, we did not observe any noticeable increase in apoptosis in KDM4A KD/KO NEPC cells as shown by western blot for cleaved caspase 3 and cleaved PARP1 (**Suppl. Figure 6C**). Since QC6352 also inhibit other KDM4 family members, the apoptosis observed in QC6352-treated cells may be attributed to simultaneous inhibition of multiple KDM4 family members in NEPC cells. This notion is supported by the previous reports that KDM4 family members, such as KDM4B and KDM4D, play a role in DNA damage response.<sup>44,45</sup> Also, KDM4A plays a role in replication stress.<sup>43</sup> Interestingly, GSEA analysis identified apoptosis signature in *Kdm4a*-KD PTR cells compared to control cells (**Suppl. Figure 7D**), although it does not rank as the top pathways. This finding suggests that inhibition of KDM4A may also contribute to apoptosis induced by QC6352. However, future studies are needed to delineate the functions of individual KDM4 family members in QC6352-induced apoptosis NEPC.

In summary, our study established KDM4A as an important epigenetic regulator that drives NEPC progression and can serve as an effective therapeutic target.

## MATERIALS and METHODS

### Mice strains

*Pb-Cre4; Pten<sup>loxP/loxP</sup> (Pten<sup>pc/-</sup>), Pb-Cre4; Pten<sup>loxP/loxP</sup>; Smad4<sup>loxP/loxP</sup> (aka Pten<sup>pc/-</sup> Smad4<sup>pc/-</sup>),* and *Pb-Cre4; Pten<sup>loxP/loxP</sup>; Trp53<sup>loxP/loxP</sup> (aka Pten<sup>pc/-</sup> Trp53<sup>pc/-</sup>)* models were developed previously<sup>46</sup>. *Rb1<sup>loxP/loxP</sup>* strain (FVB;129-Rb1tm2Brn/Nci) was obtained from NCI Mouse Repository. *Kdm4a<sup>loxP/loxP</sup>* (Strain #:029424) and TRAMP mice (stock # 003135) were obtained from Jackson Laboratory. *Pten<sup>pc/-</sup> Smad4<sup>pc/-</sup>* and *Pten<sup>pc/-</sup> Trp53<sup>pc/-</sup>* mice were crossed with *Rb1<sup>loxP/loxP</sup>* mice to generate *Pb-Cre4; Pten<sup>loxP/loxP</sup>; Smad4<sup>loxP/loxP</sup> Trp53<sup>loxP/loxP</sup> Rb1<sup>loxP/loxP</sup> (Pten<sup>pc/-</sup> Smad4<sup>pc/-</sup> Trp53<sup>pc/-</sup> Rb1<sup>pc/-</sup>, **PSTR)** and *Pb-Cre4; Pten<sup>loxP/loxP</sup>; Trp53<sup>loxP/loxP</sup>; Rb1<sup>loxP/loxP</sup> (Pten<sup>pc/-</sup> Trp53<sup>pc/-</sup> Rb1<sup>pc/-</sup>, **PTR)***. The genotyping of the Pb-Cre4 transgene and all the conditional alleles were performed using conventional PCR as described previously.<sup>46-49</sup> The copy number of TRAMP transgene will be determined by quantitative PCR<sup>50</sup> and only mice that are homozygous for the transgene were used in this study. Mice were maintained in pathogen-free conditions at M.D. Anderson Cancer Center. All manipulations were approved under MD Anderson Cancer Center (MDACC) Institutional Animal Care and Use Committee (IACUC) under protocol number 00001713-RN01.*

### Human prostate tumor tissues and patient-derived xenografts (PDX)

FFPE Primary castration resistant prostate tumor tissues were obtained from Dr. Patricia Troncoso and Dr. Miao Zhang MD Anderson Tissue Bank. FFPE and fresh tumor tissues from PDXs were obtained from Dr. Nora Navone (GU PDX core). The Movember PDX TMA has been described previously.<sup>23</sup>

### Cell lines and cell cultures

PTR and PSTr cell lines were isolated from *Pten*<sup>pc/-</sup>*Trp53*<sup>pc/-</sup>*Rbl*<sup>pc/-</sup> and isolated from *Pten*<sup>pc/-</sup>*Smad4*<sup>c/-</sup>*Trp53*<sup>pc/-</sup>*Rbl*<sup>pc/-</sup> mice. All cell lines tested for mycoplasma were negative within 6 months of performing the experiments. Cell line authentication was not performed. 293T, NCI-H660, LASCPC-01, and MYC-CaP cells were obtained from ATCC. 144-13 was generated from PDX MDA PCa 144-13.<sup>26</sup> 293FT cells were obtained from Thermo Fisher Scientific Inc. 144-13, LASCPC-01 and NCI-H660 cells were cultured in HITES medium supplemented with 5% fetal bovine serum using ATCC-formulated RPMI-1640 Medium (Catalog No.30-2001) with the following components to the base medium: 0.005 mg/ml Insulin, 0.01 mg/ml Transferrin, 30nM Sodium selenite (final conc.), 10 nM Hydrocortisone (final conc.), 10 nM beta-estradiol (final conc.), extra 2mM L-glutamine (for final conc. of 4 mM).

#### **siRNA/shRNA knockdown and CRISPR/Cas9 genome editing**

siRNAs were ordered from Dharmacon Inc (human KDM4A: GUAUGAUCUCCAGACUUA; GUGCGGAGUCUACCAAUUU; mouse Kdm4a: GAACAUCCUACGACGAUUAU; GUUCGUGAGUUCCGCAAGA; human MYC: AACGUUAGCUUCACCAACA; AACGUUAGCUUCACCAACA; mouse Myc: GGACACACAACGUCUUYGGA; UCGAAACUCUGGUGCAUAA). Lentiviral shRNA plasmids were obtained from Sigma Aldrich (Human KDM4A: shKDM4A#1 TRCN0000013493, shKDM4A#2 TRCN0000013494, shKDM4A#3 TRCN0000013495; Mouse Kdm4a: shKdm4a#2 TRCN0000103526). Mouse shKdm4a#4 plasmid was obtained from VectorBuilder of which sequence of siKdm4a#4 (GUUCGUGAGUUCCGCAAGA) was cloned into the lentiviral vector (VB210619-1017gjm). Lentiviruses were packaged in 293FT cells using second generation packaging vectors, psPAX2 (Addgene plasmid 12260) and pMD2.G (Addgene plasmid 12259). Synthetic guided RNA (sgRNA) was ordered from Synthego Inc. Recombinant cas9 was obtained from Thermo Fisher



Scientific Inc. sgRNAs and recombinant cas9 were transfected into cells according to the protocol from the manufacturer. Single clones were selected, and *Kdm4a* KO clones were confirmed by western blot analysis.

### **Chemicals and inhibitors**

QC6352 (HY-104048), NCGC00247743 (HY-112308), Enzalutamide (HY-70002), GSK126 (HY-13470), MYCi975 (MYCi975) were ordered from MedChemExpress Inc. Incucyte Caspase 3/7 Dye for Apoptosis (Cat#4440) was ordered from Sartorius.

### **Western Blot Analysis**

Cells were lysed on ice using RIPA buffer (Boston BioProducts) supplemented with Protease and Phosphatase Inhibitor Cocktail (Thermo Fisher Scientific). Proteins with loading buffer (20 µg) were subjected to SDS-PAGE and transferred onto a nitrocellulose membrane. Membrane was blocked in 2% non-fat dry milk for an hour before being incubated with primary antibodies prepared in TBST consisting of 0.5% BSA overnight at 4°C. Next, the membrane was washed 3 times with Tris- buffered saline (TBS) containing 0.1% Tween 20 (TBST) and was incubated with HRP- conjugated secondary antibody for 2 h in room temperature. After washing 3 times with TBST, the membrane was exposed to Clarity Western ECL Substrate (Bio-Rad) according to the protocol and imaged with Azure Biosystems c600. The following antibodies were used in this study: KDM4A (ab191433, Abcam), beta-Actin (MA5-15739, Invitrogen), cleaved-PARP (Mouse specific #9544; human specific #9546, Cell Signaling Technology) cleaved-caspase 3 (#9662, Cell Signaling Technology), cMyc (ab32072, Abcam), c-Anti-Rabbit IgG HRP- linked antibody (#7074, Cell Signaling Technology), Anti-Mouse IgG HRP-linked antibody (#7076, Cell Signaling Technology).

### **Immunohistochemistry analyses**

Tissues were fixed in 10% formalin overnight and embedded in paraffin. Immunohistochemical (IHC) analysis was performed as described earlier (Aguirre et al., 2003). Primary antibodies used for immunohistochemistry are as follows: KDM4A (ab191433, Abcam), KDM4A (3393S, CST), Ki-67 (GTX16667, GeneTex), Synaptophysin (M7315, Dako), AR (ab133273, Abcam), Chromogranin A (20086, ImmunoStar). Secondary antibodies used are as follows: anti-rabbit(RMR622L, Biocare), anti-mouse(8125S, CST). The immunohistochemistry signals were developed with DAB Quanto(TA-125-QHDX, Epredia).

### **Cell proliferation, Foci-formation, soft-agar colony forming, and apoptosis assays**

For cell proliferation assay,  $5 \times 10^2$ - $2 \times 10^3$  cells per well were seeded in 96-well plate with or without corresponding treatment. After 5 days, absorbance was measured using Cell Counting Kit-8 (B34034, Bimake) according to the manufacture's manual. For foci-formation assay,  $1 \times 10^3$  cells were seeded in 6-well plates and cultured for 5 to 7 days before they were fixed and stained with crystal violet as described.<sup>51</sup> For soft-agar colony forming assay,  $2.5 \times 10^3$  cells were seeded in 6-well. Cells were cultured for 3 weeks. Colony sizes and number were measured as described.<sup>52</sup> Apoptosis was detected by flow cytometry analysis of cells stained with Annexin V and PI staining or by Cytation 5 using Caspase3/7 dye for apoptosis (Cat#44440, Sartorius).

### **Xenograft Studies**

PSTR ( $1 \times 10^5$  cells/100ul per mouse) and 144-13 ( $2 \times 10^6$ /100ul per mouse) cells were prepared in 1:1 PBS and Matrigel (BD Biosciences) and injected into flanks of 6-week-old nude mice (n = 5-10 per group). Mice were treated with 50\_mg/kg QC6352 (once a day) when tumors reached  $100\text{mm}^3$ . Tumor growth was monitored by measuring tumor sizes twice a week. Tumor Volume was calculated according to the formula: Volume = length  $\times$  width<sup>2</sup>/2. All xenograft experiments

were approved by the MD Anderson IACUC under protocol number #00001713-RN01.

### **Quantitative RT-PCR and RNA-sequencing**

Cell mRNA was isolated by Direct-zol RNA MiniPrep (50ug) (#11-331, ZymoResearch). iScript cDNA Synthesis Kit (Bio-Rad) was used to generate cDNA for quantitative PCR (qPCR) analysis using PerfeCTa reg SYBR reg Green SuperMix Reaction Mixes (QuantaBio). The primers used for qPCR analysis. Cell mRNA was isolated by RNeasy Kit (Qiagen) and reverse transcribed using Superscript III cDNA Synthesis Kit (Life Technology). Quantitative PCR was performed using SYBR-GreenER Kit (Life Technology). The primers used were listed in Suppl. Table 4. RNA-seq of PTR cells with shRNA control and shRNA Kdm4a#2 were performed on total RNA (3 replicates) using NEBNext® Ultra II Directional RNA Library Prep Kit for Illumina NextSeq at the Cancer Genomics Center, The University of Texas Health Science Center at Houston. The raw data will be submitted to the NCBI Gene Expression Omnibus (GEO). Processed human RNA-seq datasets from previous studies (Grasso et al.,<sup>53</sup> Abida et al.,<sup>25</sup> and Beltran et al.<sup>20</sup>) were downloaded from cBioportal.<sup>54,55</sup> Publicly available RNA-seq datasets (GSE158467, GSE90891, GSE95293, GSE137953, and GSE95293) were downloaded from NCBI GEO. DeSeq2 was used to identified differentially expressed genes. DEGs were used for gene set enrichment analysis (GSEA) as described.<sup>47</sup>

### **Chromatin-immunoprecipitation (ChIP), ChIP-sequencing, and Cut and Run**

ChIP-seq was performed in 144-13 cells as described<sup>51</sup> using the following antibodies at the MD Anderson Epigenomics Profiling Core: anti-KDM4A antibody ((#5766, lot 021110, Schuele Laboratory), H3K27ac (ab4729, Abcam), H3K9me3 (C15410056, Diagenode), H3K36me3 (ab9050, Abcam). Libraries were prepared using NEBNext Ultra DNA Library Kit (E7370). Sequencing was performed using an Illumina HiSeq 2500 instrument. Reads were aligned to a

reference genome Hg19 as described.<sup>56</sup> The raw data will be submitted to the NCBI Gene Expression Omnibus (GEO). Publicly available ChIP-seq dataset GSE95190 was downloaded from NCBI GEO.

## Statistical analysis

All the experiments were replicated at least twice in the laboratory except for microarray and ChIP. Data are presented as mean  $\pm$  SD unless indicated otherwise. Student's t test assuming two-tailed distributions was used to calculate statistical significance between groups.

\*\*\*\*  $P < 0.0001$ , \*\*\*  $P < 0.001$ ; \*\*  $P < 0.005$ ; \*  $P < 0.05$ .

## Acknowledgements

We thank Sarah E. Townsend for editing. G.W. is supported by funding from MDACC (Moon Shot, IRG, and PCRP), UT STARs Award (The University of Texas System Board of Regents), NIH [R00 CA194289 (GW), P50 CA140388(C. Logothetis, S.-H. Lin)], DoD [DOD-PCRP-Idea W81XWH-21-1-0522(GW)]. S.H.L. is supported by grants from the NIH R01CA174798 (S.-H. Lin), NIH 5P50CA140388 (C. Logothetis, S.-H. Lin), and Cancer Prevention Research Institute of Texas grants RP150179 & RP190252 (S.-H. Lin). This study is supported by NIH P30CA016672 for the use of Research Animal Support Facility, Flow Cytometry and Cellular Imaging Core Facility, and Functional Genomics Core at MD Anderson Cancer Center. We thank the support from the Cancer Prevention and Research Institute of Texas (CPRIT RP180734) for the RNA-seq service provided at Cancer Genomics Center, The University of Texas Health Science Center at Houston. We thank the support from Epigenomics Profiling Core, Center for Cancer Epigenetics and the Department of Epigenetics and Molecular Carcinogenesis for the ChIP-seq services.

## Author Contributions

G.W. contributed to the study's conception and design of this study. G.W., C.M., M.Z., X.L., F.W., A.G.H., X.S., D.L., J.P., M.Z., P.T., and J.Z. performed the experiments and acquired, analyzed, and interpreted the data (e.g., statistical analysis, biostatistics, computational analysis). P.S., N.N., E.M., and R.S. provided key reagents. A.K.J., M.G.L., P.C., C.J.L., A.A., provided scientific inputs for the development of the project. C.M., S.H.L and G.W. contributed to the writing and editing the manuscript.

## Competing Interests statement

CJL reports receiving commercial research grants from Bayer, Sanofi, Janssen, Astellas Pharma, Pfizer; and honoraria from Bayer, Janssen, Sanofi, Astellas Pharma. No potential conflicts of interest were disclosed by the other authors.

## Reference:

1. Aggarwal, R., *et al.* Clinical and Genomic Characterization of Treatment-Emergent Small-Cell Neuroendocrine Prostate Cancer: A Multi-institutional Prospective Study. *J Clin Oncol* **36**, 2492-2503 (2018).
2. Beltran, H., *et al.* Aggressive variants of castration-resistant prostate cancer. *Clinical cancer research : an official journal of the American Association for Cancer Research* **20**, 2846-2850 (2014).
3. Sayegh, N., Swami, U. & Agarwal, N. Recent Advances in the Management of Metastatic Prostate Cancer. *JCO Oncol Pract* **18**, 45-55 (2022).
4. Halabi, S., *et al.* Meta-Analysis Evaluating the Impact of Site of Metastasis on Overall Survival in Men With Castration-Resistant Prostate Cancer. *J Clin Oncol* **34**, 1652-1659 (2016).
5. Davies, A., Zoubeidi, A. & Selth, L.A. The epigenetic and transcriptional landscape of neuroendocrine prostate cancer. *Endocr Relat Cancer* **27**, R35-R50 (2020).
6. Black, J.C., Van Rechem, C. & Whetstone, J.R. Histone lysine methylation dynamics: establishment, regulation, and biological impact. *Mol Cell* **48**, 491-507 (2012).
7. Sehrawat, A., *et al.* LSD1 activates a lethal prostate cancer gene network independently of its demethylase function. *Proceedings of the National Academy of Sciences of the United States of America* **115**, E4179-E4188 (2018).

8. Lee, D.H., *et al.* Advances in histone demethylase KDM4 as cancer therapeutic targets. *FASEB J* **34**, 3461-3484 (2020).
9. Yang, Y.A. & Yu, J. EZH2, an epigenetic driver of prostate cancer. *Protein Cell* **4**, 331-341 (2013).
10. Li, N., *et al.* AKT-mediated stabilization of histone methyltransferase WHSC1 promotes prostate cancer metastasis. *The Journal of clinical investigation* **127**, 1284-1302 (2017).
11. Vatapalli, R., *et al.* Histone methyltransferase DOT1L coordinates AR and MYC stability in prostate cancer. *Nat Commun* **11**, 4153 (2020).
12. Mu, P., *et al.* SOX2 promotes lineage plasticity and antiandrogen resistance in TP53- and RB1-deficient prostate cancer. *Science* **355**, 84-88 (2017).
13. Ku, S.Y., *et al.* Rb1 and Trp53 cooperate to suppress prostate cancer lineage plasticity, metastasis, and antiandrogen resistance. *Science* **355**, 78-83 (2017).
14. Berger, A., *et al.* N-Myc-mediated epigenetic reprogramming drives lineage plasticity in advanced prostate cancer. *The Journal of clinical investigation* **130**, 3924-3940 (2019).
15. Dardenne, E., *et al.* N-Myc Induces an EZH2-Mediated Transcriptional Program Driving Neuroendocrine Prostate Cancer. *Cancer cell* **30**, 563-577 (2016).
16. Lee, J.K., *et al.* N-Myc Drives Neuroendocrine Prostate Cancer Initiated from Human Prostate Epithelial Cells. *Cancer cell* **29**, 536-547 (2016).
17. Zhang, Y., *et al.* Androgen deprivation promotes neuroendocrine differentiation and angiogenesis through CREB-EZH2-TSP1 pathway in prostate cancers. *Nat Commun* **9**, 4080 (2018).
18. Berry, W.L. & Janknecht, R. KDM4/JMJD2 histone demethylases: epigenetic regulators in cancer cells. *Cancer research* **73**, 2936-2942 (2013).
19. Kim, T.D., *et al.* Histone demethylase JMJD2A drives prostate tumorigenesis through transcription factor ETV1. *The Journal of clinical investigation* **126**, 706-720 (2016).
20. Beltran, H., *et al.* Divergent clonal evolution of castration-resistant neuroendocrine prostate cancer. *Nature medicine* **22**, 298-305 (2016).
21. Epstein, J.I., *et al.* Proposed morphologic classification of prostate cancer with neuroendocrine differentiation. *The American journal of surgical pathology* **38**, 756-767 (2014).
22. Li, N., *et al.* JARID1D Is a Suppressor and Prognostic Marker of Prostate Cancer Invasion and Metastasis. *Cancer research* **76**, 831-843 (2016).
23. Navone, N.M., *et al.* Movember GAP1 PDX project: An international collection of serially transplantable prostate cancer patient-derived xenograft (PDX) models. *Prostate* **78**, 1262-1282 (2018).
24. Hurwitz, A.A., Foster, B.A., Allison, J.P., Greenberg, N.M. & Kwon, E.D. The TRAMP mouse as a model for prostate cancer. *Curr Protoc Immunol* **Chapter 20**, Unit 20 25 (2001).
25. Abida, W., *et al.* Genomic correlates of clinical outcome in advanced prostate cancer. *Proceedings of the National Academy of Sciences of the United States of America* **116**, 11428-11436 (2019).
26. Kleb, B., *et al.* Differentially methylated genes and androgen receptor re-expression in small cell prostate carcinomas. *Epigenetics* **11**, 184-193 (2016).
27. Zhang, Q.J., *et al.* The histone trimethyllysine demethylase JMJD2A promotes cardiac hypertrophy in response to hypertrophic stimuli in mice. *The Journal of clinical investigation* **121**, 2447-2456 (2011).



28. Gingrich, J.R., *et al.* Androgen-independent prostate cancer progression in the TRAMP model. *Cancer research* **57**, 4687-4691 (1997).
29. Gingrich, J.R., *et al.* Metastatic prostate cancer in a transgenic mouse. *Cancer research* **56**, 4096-4102 (1996).
30. Greenberg, N.M., *et al.* Prostate cancer in a transgenic mouse. *Proceedings of the National Academy of Sciences of the United States of America* **92**, 3439-3443 (1995).
31. Chiaverotti, T., *et al.* Dissociation of epithelial and neuroendocrine carcinoma lineages in the transgenic adenocarcinoma of mouse prostate model of prostate cancer. *Am J Pathol* **172**, 236-246 (2008).
32. Wang, L.Y., *et al.* KDM4A Coactivates E2F1 to Regulate the PDK-Dependent Metabolic Switch between Mitochondrial Oxidation and Glycolysis. *Cell Rep* **16**, 3016-3027 (2016).
33. Park, J.W., *et al.* Reprogramming normal human epithelial tissues to a common, lethal neuroendocrine cancer lineage. *Science* **362**, 91-95 (2018).
34. Chen, Y.K., *et al.* Design of KDM4 Inhibitors with Antiproliferative Effects in Cancer Models. *ACS Med Chem Lett* **8**, 869-874 (2017).
35. Metzger, E., *et al.* KDM4 Inhibition Targets Breast Cancer Stem-like Cells. *Cancer research* **77**, 5900-5912 (2017).
36. Chu, C.H., *et al.* KDM4B as a target for prostate cancer: structural analysis and selective inhibition by a novel inhibitor. *J Med Chem* **57**, 5975-5985 (2014).
37. Duan, L., *et al.* KDM4/JMJD2 Histone Demethylase Inhibitors Block Prostate Tumor Growth by Suppressing the Expression of AR and BMYB-Regulated Genes. *Chem Biol* **22**, 1185-1196 (2015).
38. Schiller, R., *et al.* A cell-permeable ester derivative of the JmjC histone demethylase inhibitor IOX1. *ChemMedChem* **9**, 566-571 (2014).
39. Jin, C., *et al.* Chem-seq permits identification of genomic targets of drugs against androgen receptor regulation selected by functional phenotypic screens. *Proceedings of the National Academy of Sciences of the United States of America* **111**, 9235-9240 (2014).
40. Ellwood-Yen, K., *et al.* Myc-driven murine prostate cancer shares molecular features with human prostate tumors. *Cancer cell* **4**, 223-238 (2003).
41. Ellis, L., *et al.* Generation of a C57BL/6 MYC-Driven Mouse Model and Cell Line of Prostate Cancer. *Prostate* **76**, 1192-1202 (2016).
42. Hubbard, G.K., *et al.* Combined MYC Activation and Pten Loss Are Sufficient to Create Genomic Instability and Lethal Metastatic Prostate Cancer. *Cancer research* **76**, 283-292 (2016).
43. Zhang, W., *et al.* Targeting KDM4A epigenetically activates tumor-cell-intrinsic immunity by inducing DNA replication stress. *Mol Cell* **81**, 2148-2165 e2149 (2021).
44. Young, L.C., McDonald, D.W. & Hendzel, M.J. Kdm4b histone demethylase is a DNA damage response protein and confers a survival advantage following gamma-irradiation. *J Biol Chem* **288**, 21376-21388 (2013).
45. Khoury-Haddad, H., *et al.* PARP1-dependent recruitment of KDM4D histone demethylase to DNA damage sites promotes double-strand break repair. *Proceedings of the National Academy of Sciences of the United States of America* **111**, E728-737 (2014).
46. Ding, Z., *et al.* SMAD4-dependent barrier constrains prostate cancer growth and metastatic progression. *Nature* **470**, 269-273 (2011).
47. Wang, G., *et al.* Targeting YAP-Dependent MDSC Infiltration Impairs Tumor Progression. *Cancer Discov* **6**, 80-95 (2016).

48. Ding, Z., *et al.* Telomerase reactivation following telomere dysfunction yields murine prostate tumors with bone metastases. *Cell* **148**, 896-907 (2012).
49. Marino, S., Vooijs, M., van Der Gulden, H., Jonkers, J. & Berns, A. Induction of medulloblastomas in p53-null mutant mice by somatic inactivation of Rb in the external granular layer cells of the cerebellum. *Genes & development* **14**, 994-1004 (2000).
50. Chen, R., *et al.* A simple quantitative PCR assay to determine TRAMP transgene zygosity. *Prostate Cancer Prostatic Dis* **24**, 358-361 (2021).
51. Zhao, D., *et al.* Synthetic essentiality of chromatin remodelling factor CHD1 in PTEN-deficient cancer. *Nature* **542**, 484-488 (2017).
52. Lin, H.K., *et al.* Skp2 targeting suppresses tumorigenesis by Arf-p53-independent cellular senescence. *Nature* **464**, 374-379 (2010).
53. Grasso, C.S., *et al.* The mutational landscape of lethal castration-resistant prostate cancer. *Nature* **487**, 239-243 (2012).
54. Cerami, E., *et al.* The cBio cancer genomics portal: an open platform for exploring multidimensional cancer genomics data. *Cancer Discov* **2**, 401-404 (2012).
55. Gao, J., *et al.* Integrative analysis of complex cancer genomics and clinical profiles using the cBioPortal. *Sci Signal* **6**, pii (2013).
56. Heinz, S., *et al.* Simple combinations of lineage-determining transcription factors prime cis-regulatory elements required for macrophage and B cell identities. *Mol Cell* **38**, 576-589 (2010).

## FIGURE LEGENDS

**Figure 1. KDM4A is overexpressed in human and mouse NEPC.** (A) Venn Diagram showing KDM4A and KDM5D as the two histone lysine demethylases that are overexpressed in NEPC using the Beltran et al. RNA-seq dataset. (B) The expression of *KDM4A* and *KDM5D* in NEPC compared to adeno-CRPC and SCPC. (C) *Kdm4a* mRNA is upregulated in prostate tumors from older PNR mice than tumors from young PNR mice, PN mice and PN<sup>het</sup>R<sup>het</sup> mice. (D) KDM4A IHC in primary NEPC and adenocarcinoma-CRPC. (E) KDM4A IHC staining in prostate cancer PDXs. (F) KDM4A IHC in primary tumors from PS, PTR, PSTr and TRAMP mice. (G) Correlation of KDM4A mRNA expression with NE markers *CHGA* and *CHGB* in the Beltran et al. RNA-seq dataset.

**Figure 2. KDM4A knockdown or knockout suppress NEPC growth in vitro.** (A-B) *Kdm4a*



KD in PSTR cells, as confirmed by Western blot (A), led to significant reduced growth in foci-forming assay *in vitro* (B). (C-D). *Kdm4a* KD in PTR cells, as confirmed by Western blot (C), led to significant reduced growth *in vitro* (D). (E-F) *Kdm4a* KO in PTR cells, as confirmed by Western blot (E), led to significant reduced growth in foci-forming assay *in vitro* (F). (G-H) *KDM4A* KD in 144-13 cells, as confirmed by Western blot (G), led to significant reduced cell number (H). (I-J) *KDM4A* KD in 144-13 cells (I) or *Kdm4a* KO in PSTR cells (J) led to reduced number of colonies and reduced colony sizes using soft agar colony formation assay.

**Figure 3. *KDM4A* knockdown or knockout suppresses NEPC growth *in vivo*.** (A) *Kdm4a* KO delayed the growth of PSTR cells in subQ implantation model. (B) IHC staining confirmed the loss of KDM4A expression in tumors from KT compound mutant mice compared to tumors from TRAMP mice. (C) Reduced tumor weights in KT mice (20-28 weeks) compared to tumors from age-matched TRAMP mice. (D) H & E staining of prostate tumors from 20-week-old TRAMP and KT mice. (E) Kaplan Meier survival analysis comparing KT mice to TRAMP mice. (F-G) Ki67 IHC staining in prostate tumors from TRAMP and KT mice. (H) The incidences of prostate adenocarcinoma and NEPC in TRAMP and KT mice. (I) IHC staining of SYP in prostate tumors from >30-week-old and <30-week-old TRAMP mice and KT mice.

**Figure 4. *KDM4A* regulates MYC transcription in NEPC.** (A) GSEA analysis of RNA-seq on *Kdm4a*-KD and control PTR cells showed that MYC signaling is suppressed in *Kdm4a*-KD cells. (B) Fold changes in the expression of selective MYC-target genes comparing *Kdm4a*-KD cells to control cells. (C-D) GSEA analysis of Beltran et al. RNA-seq data (C) and Ku et al. RNA-seq data showed that MYC signaling is activated in NEPC compared to prostate adenocarcinoma. (E-F) Western blot showed that KDM4A KD led to reduced MYC expression in PSTR (E) and PTR (F) cells. (G) qRT-PCR showed that *Kdm4a* KD led to reduced *Myc*

mRNA expression in PTR cells. (H) ChIP-seq analyses identified *MYC* as a KDM4A-target gene in 144-13 cells. (I) *MYC* KD led to reduced cell proliferation in 144-13 cells. (J) MYC inhibitor MYCi975 led to reduced cell proliferation in 144-13 cells.

**Figure 5. KDM4 inhibitors suppress NEPC cells growth and induces apoptosis in vitro. (A)**

KDM4 inhibitor QC6352 treatment led to increased total H3K9me3 and H3K36me3 in PSTR cells. (B) QC6352 suppressed PSTR growth *in vitro* as shown by foci-forming assay. (C-D) QC6352 treatment induced apoapsis in PSTR cells as shown by Western blot analysis of cleaved caspase 3 and cleaved PARP1 and fluorescence imaging of caspase 3/7 substrates. (E) QC6352 suppressed the growth of PTR cells. (F) QC6352 induced apoptosis in PTR cells as shown by WB analysis of cleaved caspase 3 and cleaved PARP1. (G) QC6352 and NCGC00244536 suppressed the growth of 144-13 cells *in vitro*. (H) *Kdm4a*-KO blunt the effect of QC6352 treatment on cell growth *in vitro*.

**Figure 6. KDM4 inhibitor suppresses NEPC cells growth in vivo. (A-B)**

QC6352 treatment (50 mg/kg daily) suppressed the growth of subQ implanted PSTR cells as shown by weekly measurement of tumor volumes (A) and measurement of tumor weights at endpoint (B). (C-D) QC6352 treatment suppressed the growth of subQ implanted 144-13 cells as shown by weekly measurement of tumor volumes (C) and measurement of tumor volume and tumor weights at end point (D). (E) QC6352 treatment suppressed the growth of primary tumors in PSTR GEMM as shown by tumor weights at end point. (F) QC6352 treatment reduced NEPC proliferation *in vivo* as shown by IHC staining of Ki66 in tumors from PSTR mice.





Figure 1

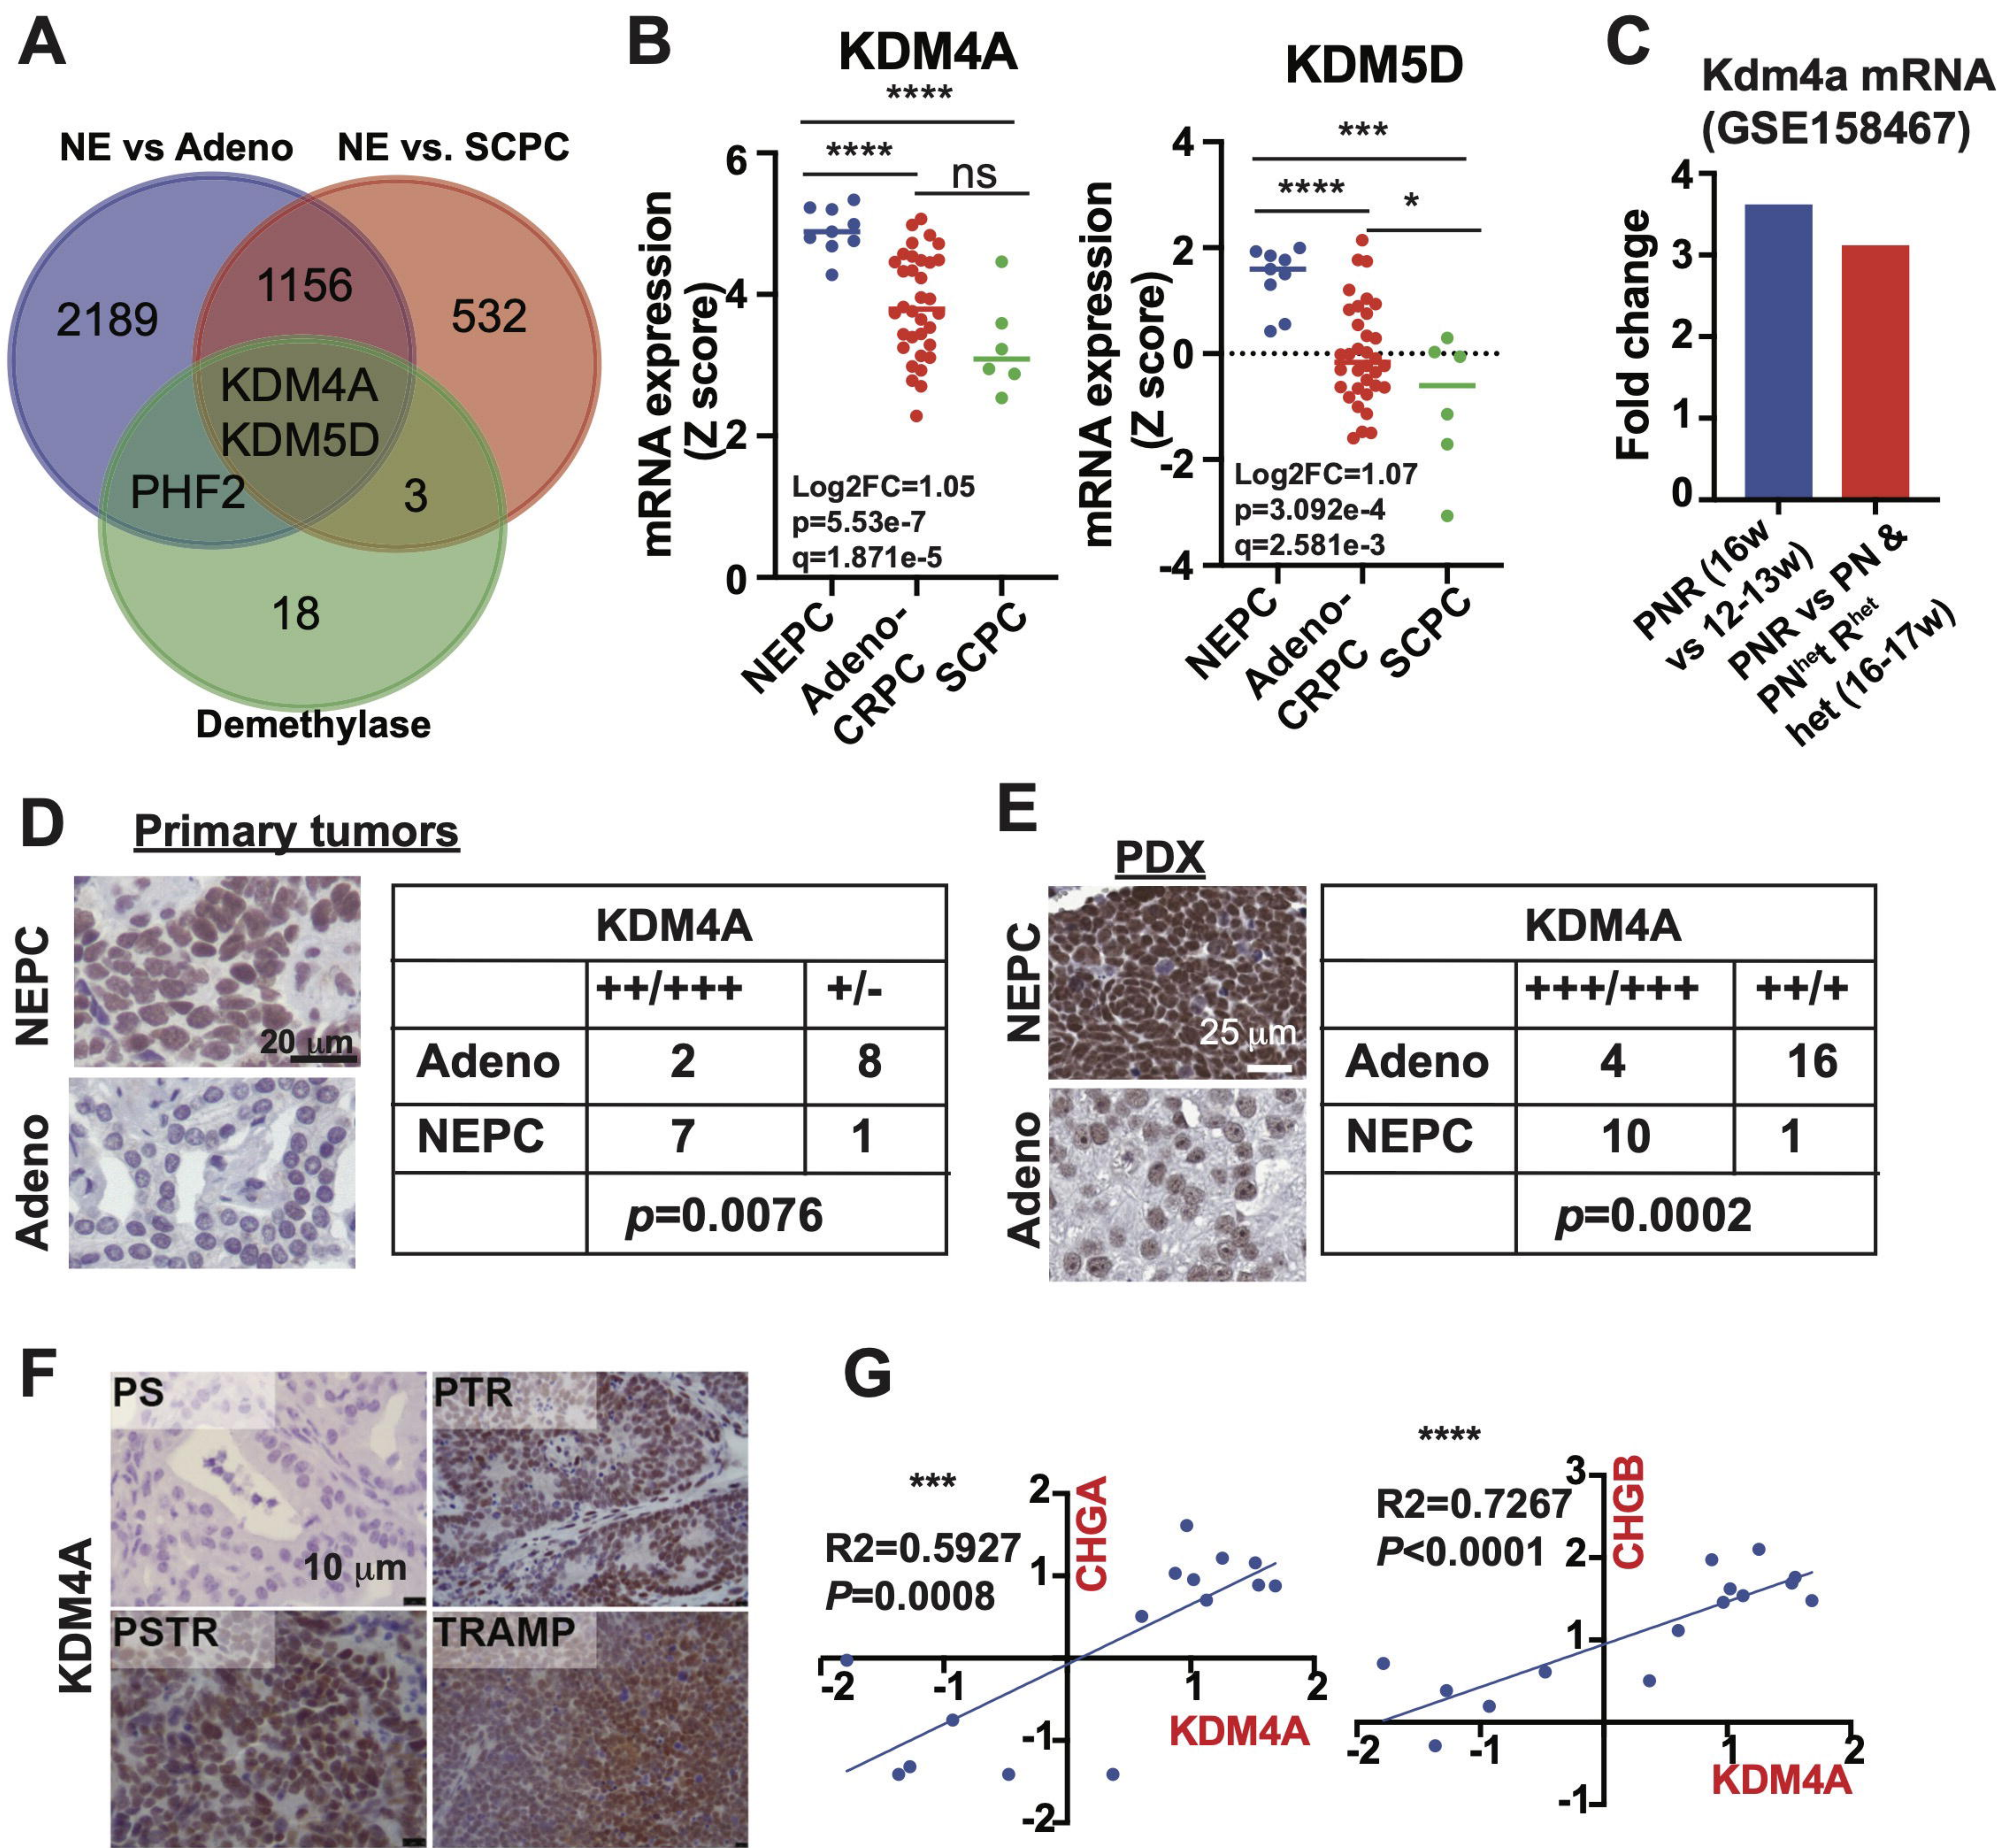



Figure 2

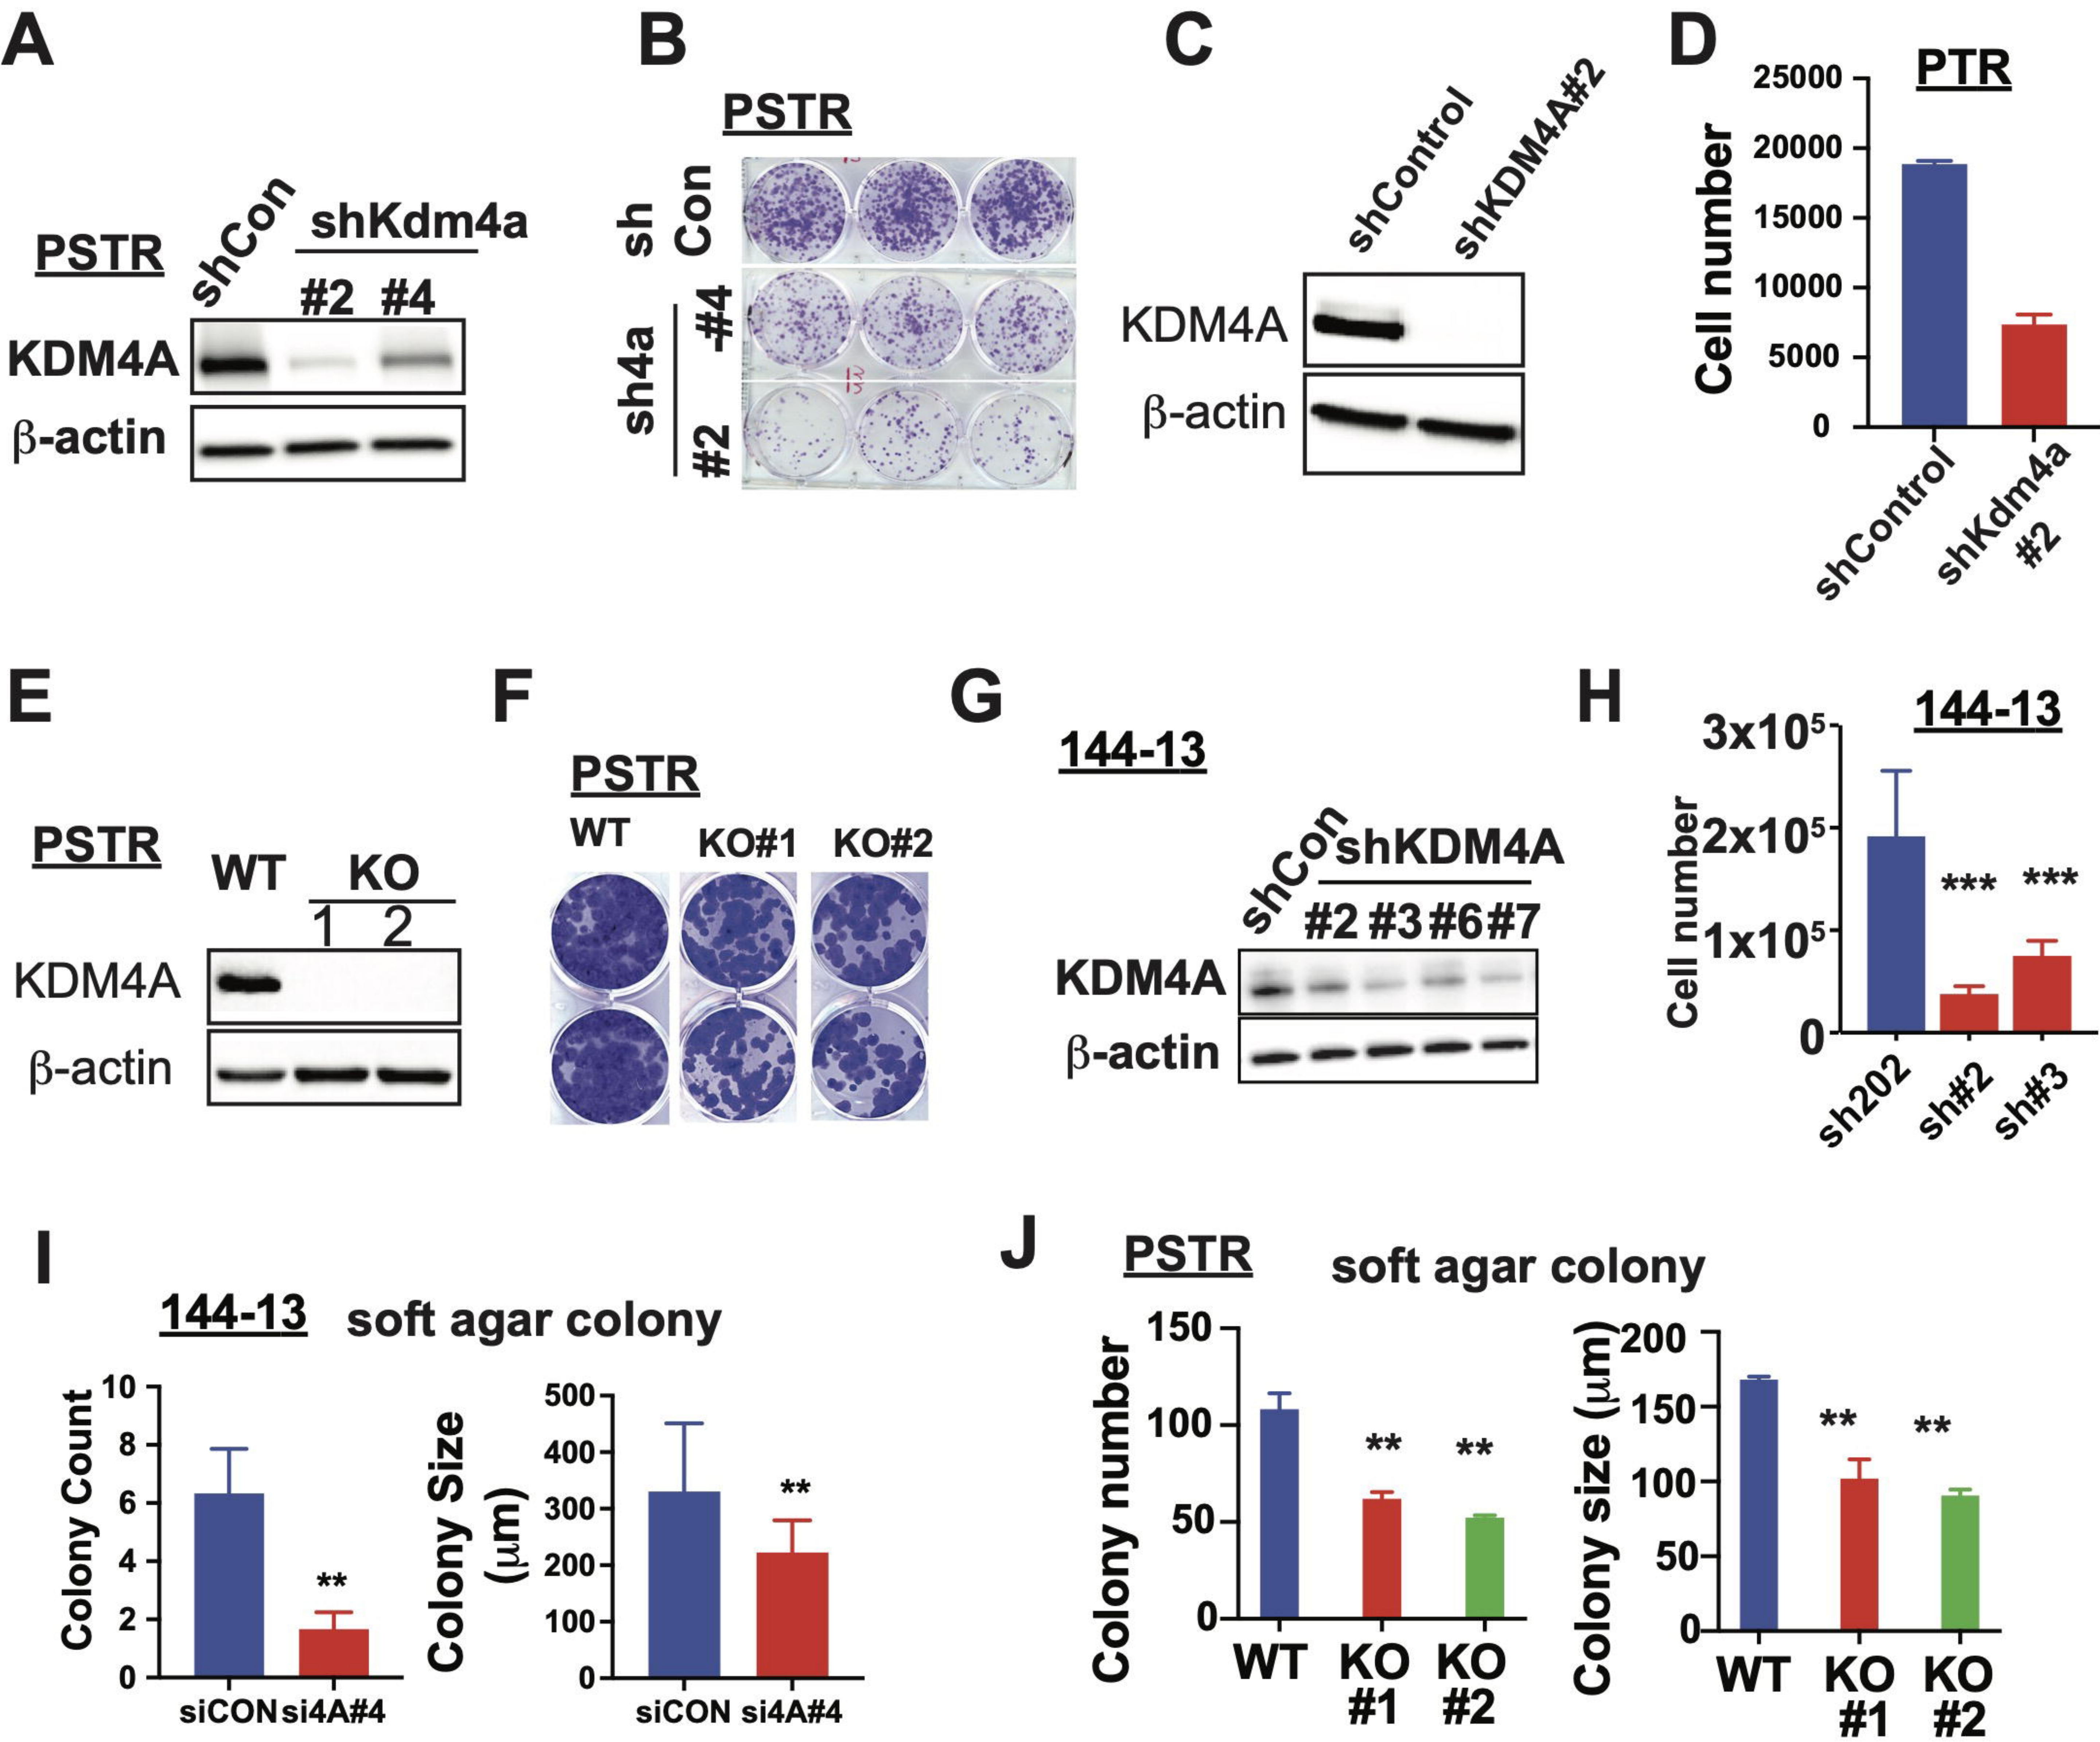



Figure 3

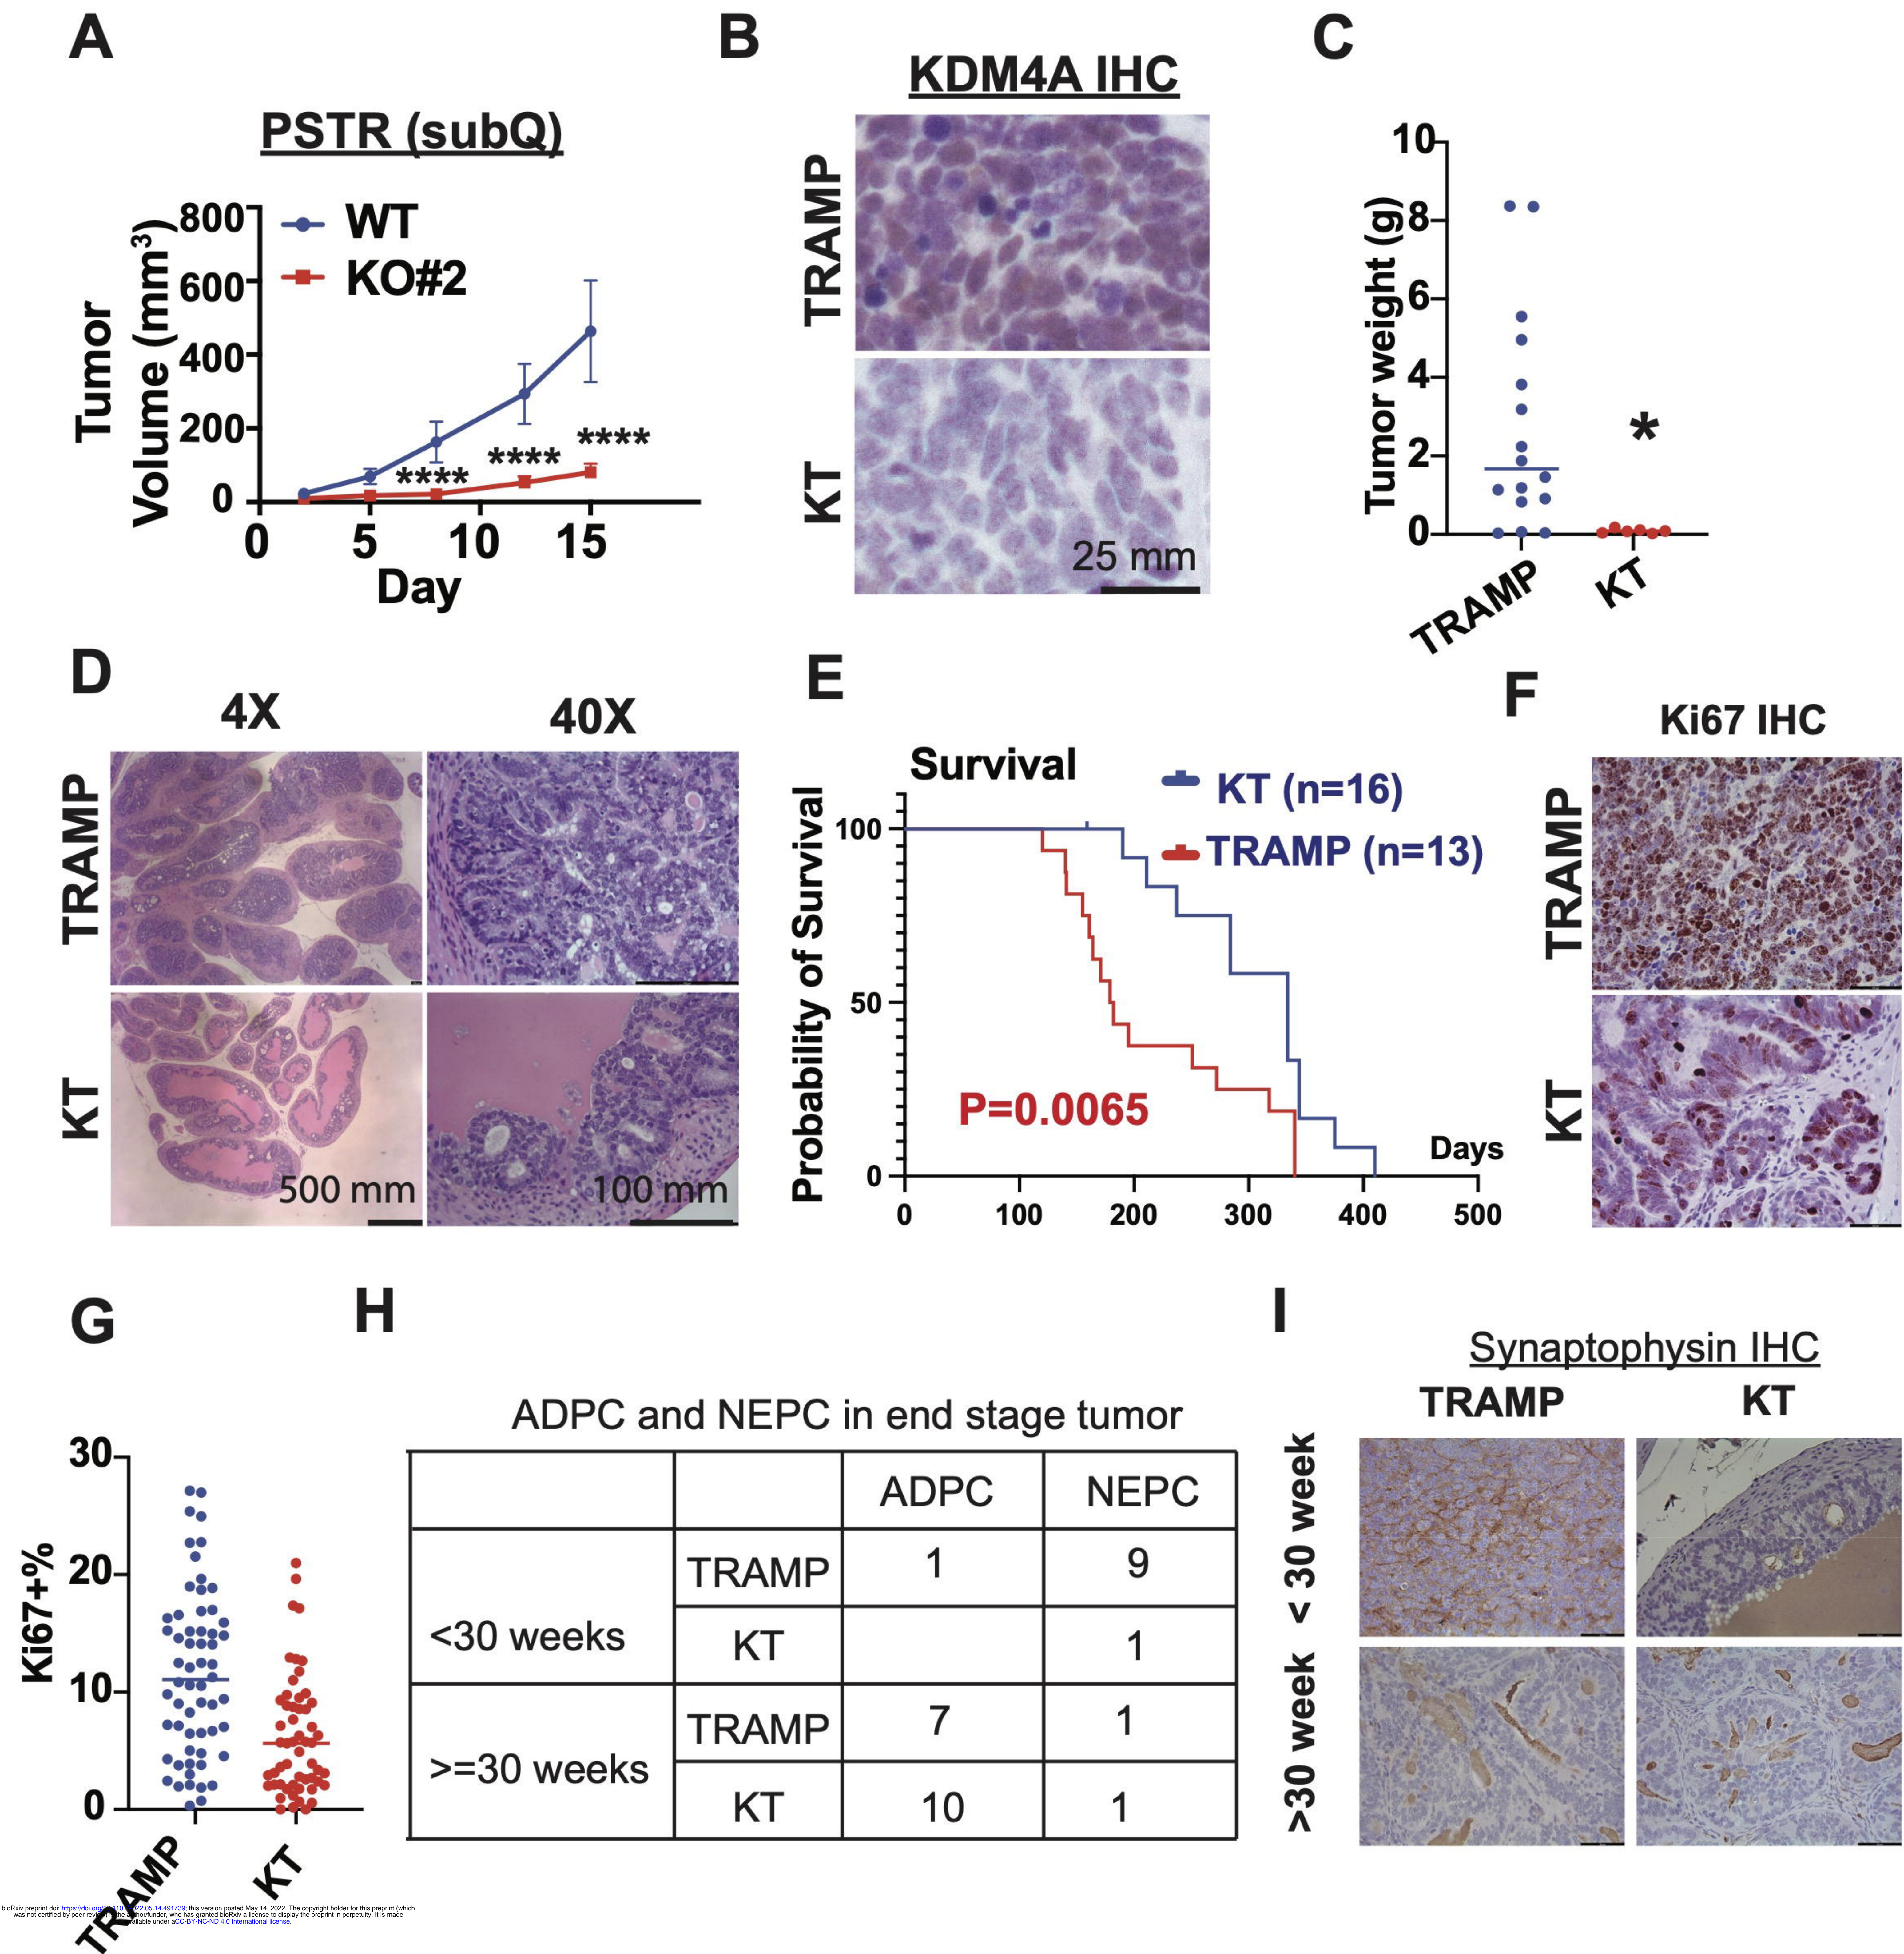



Figure 4

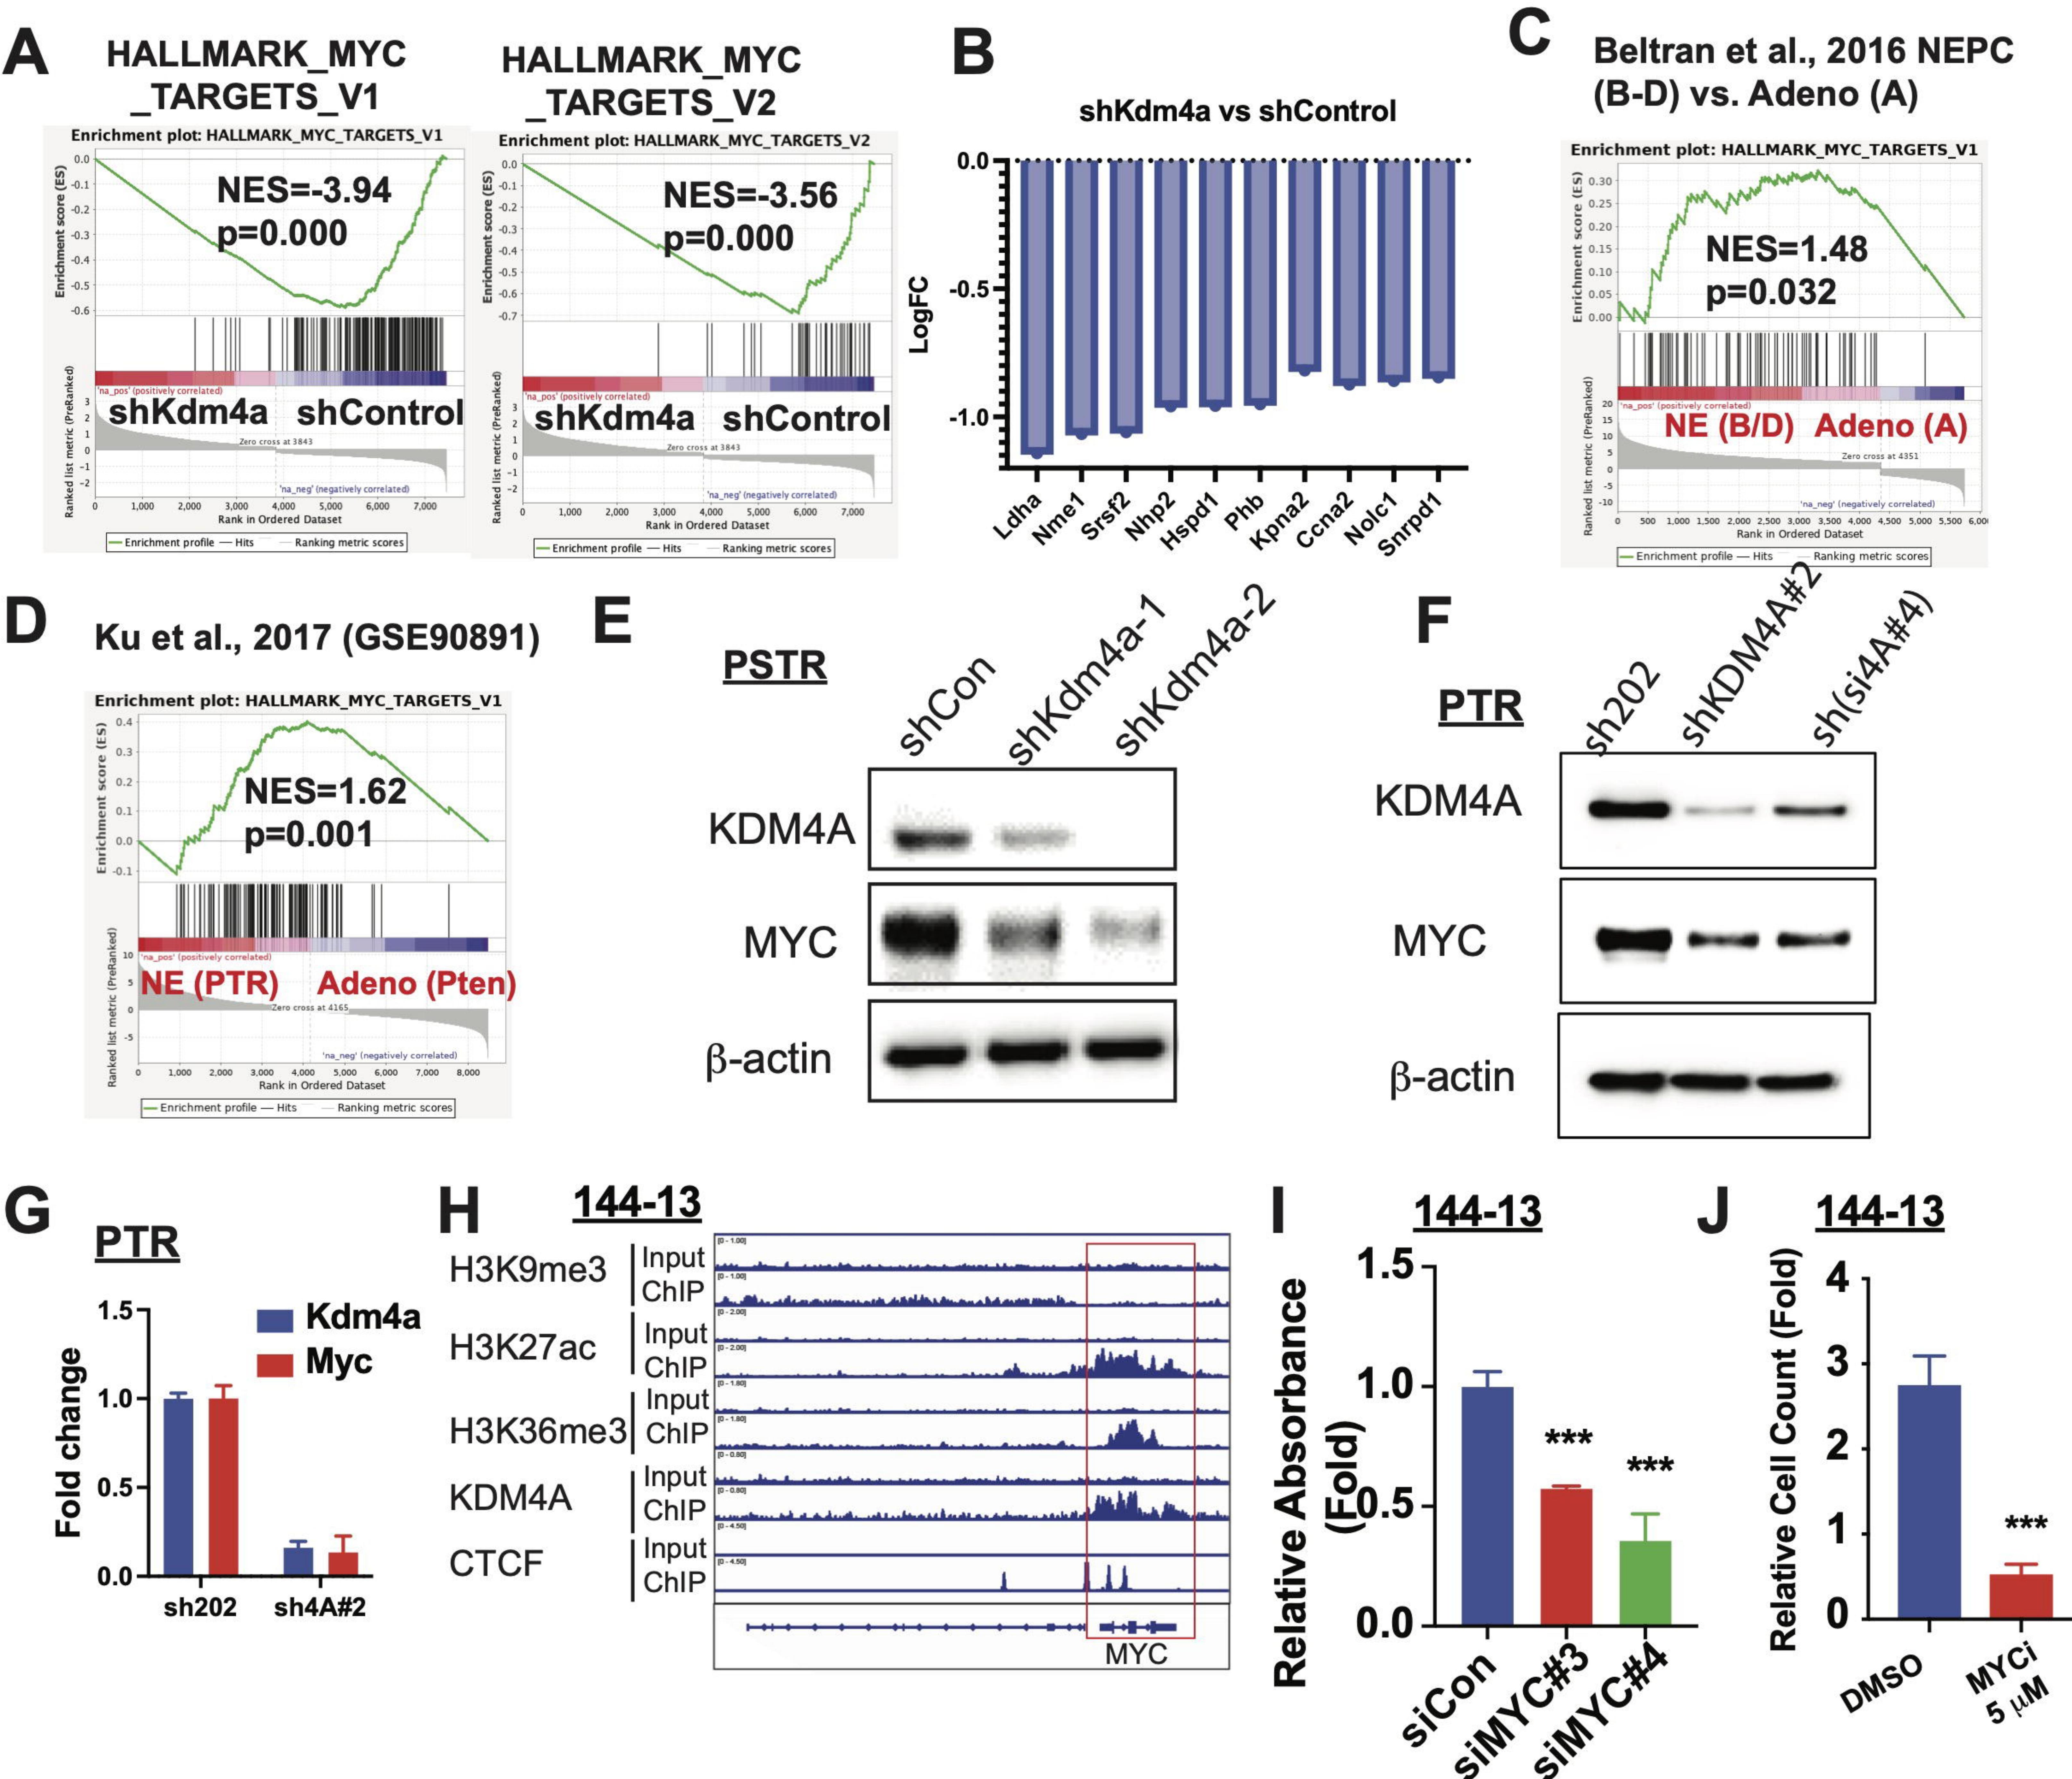



# Figure 5

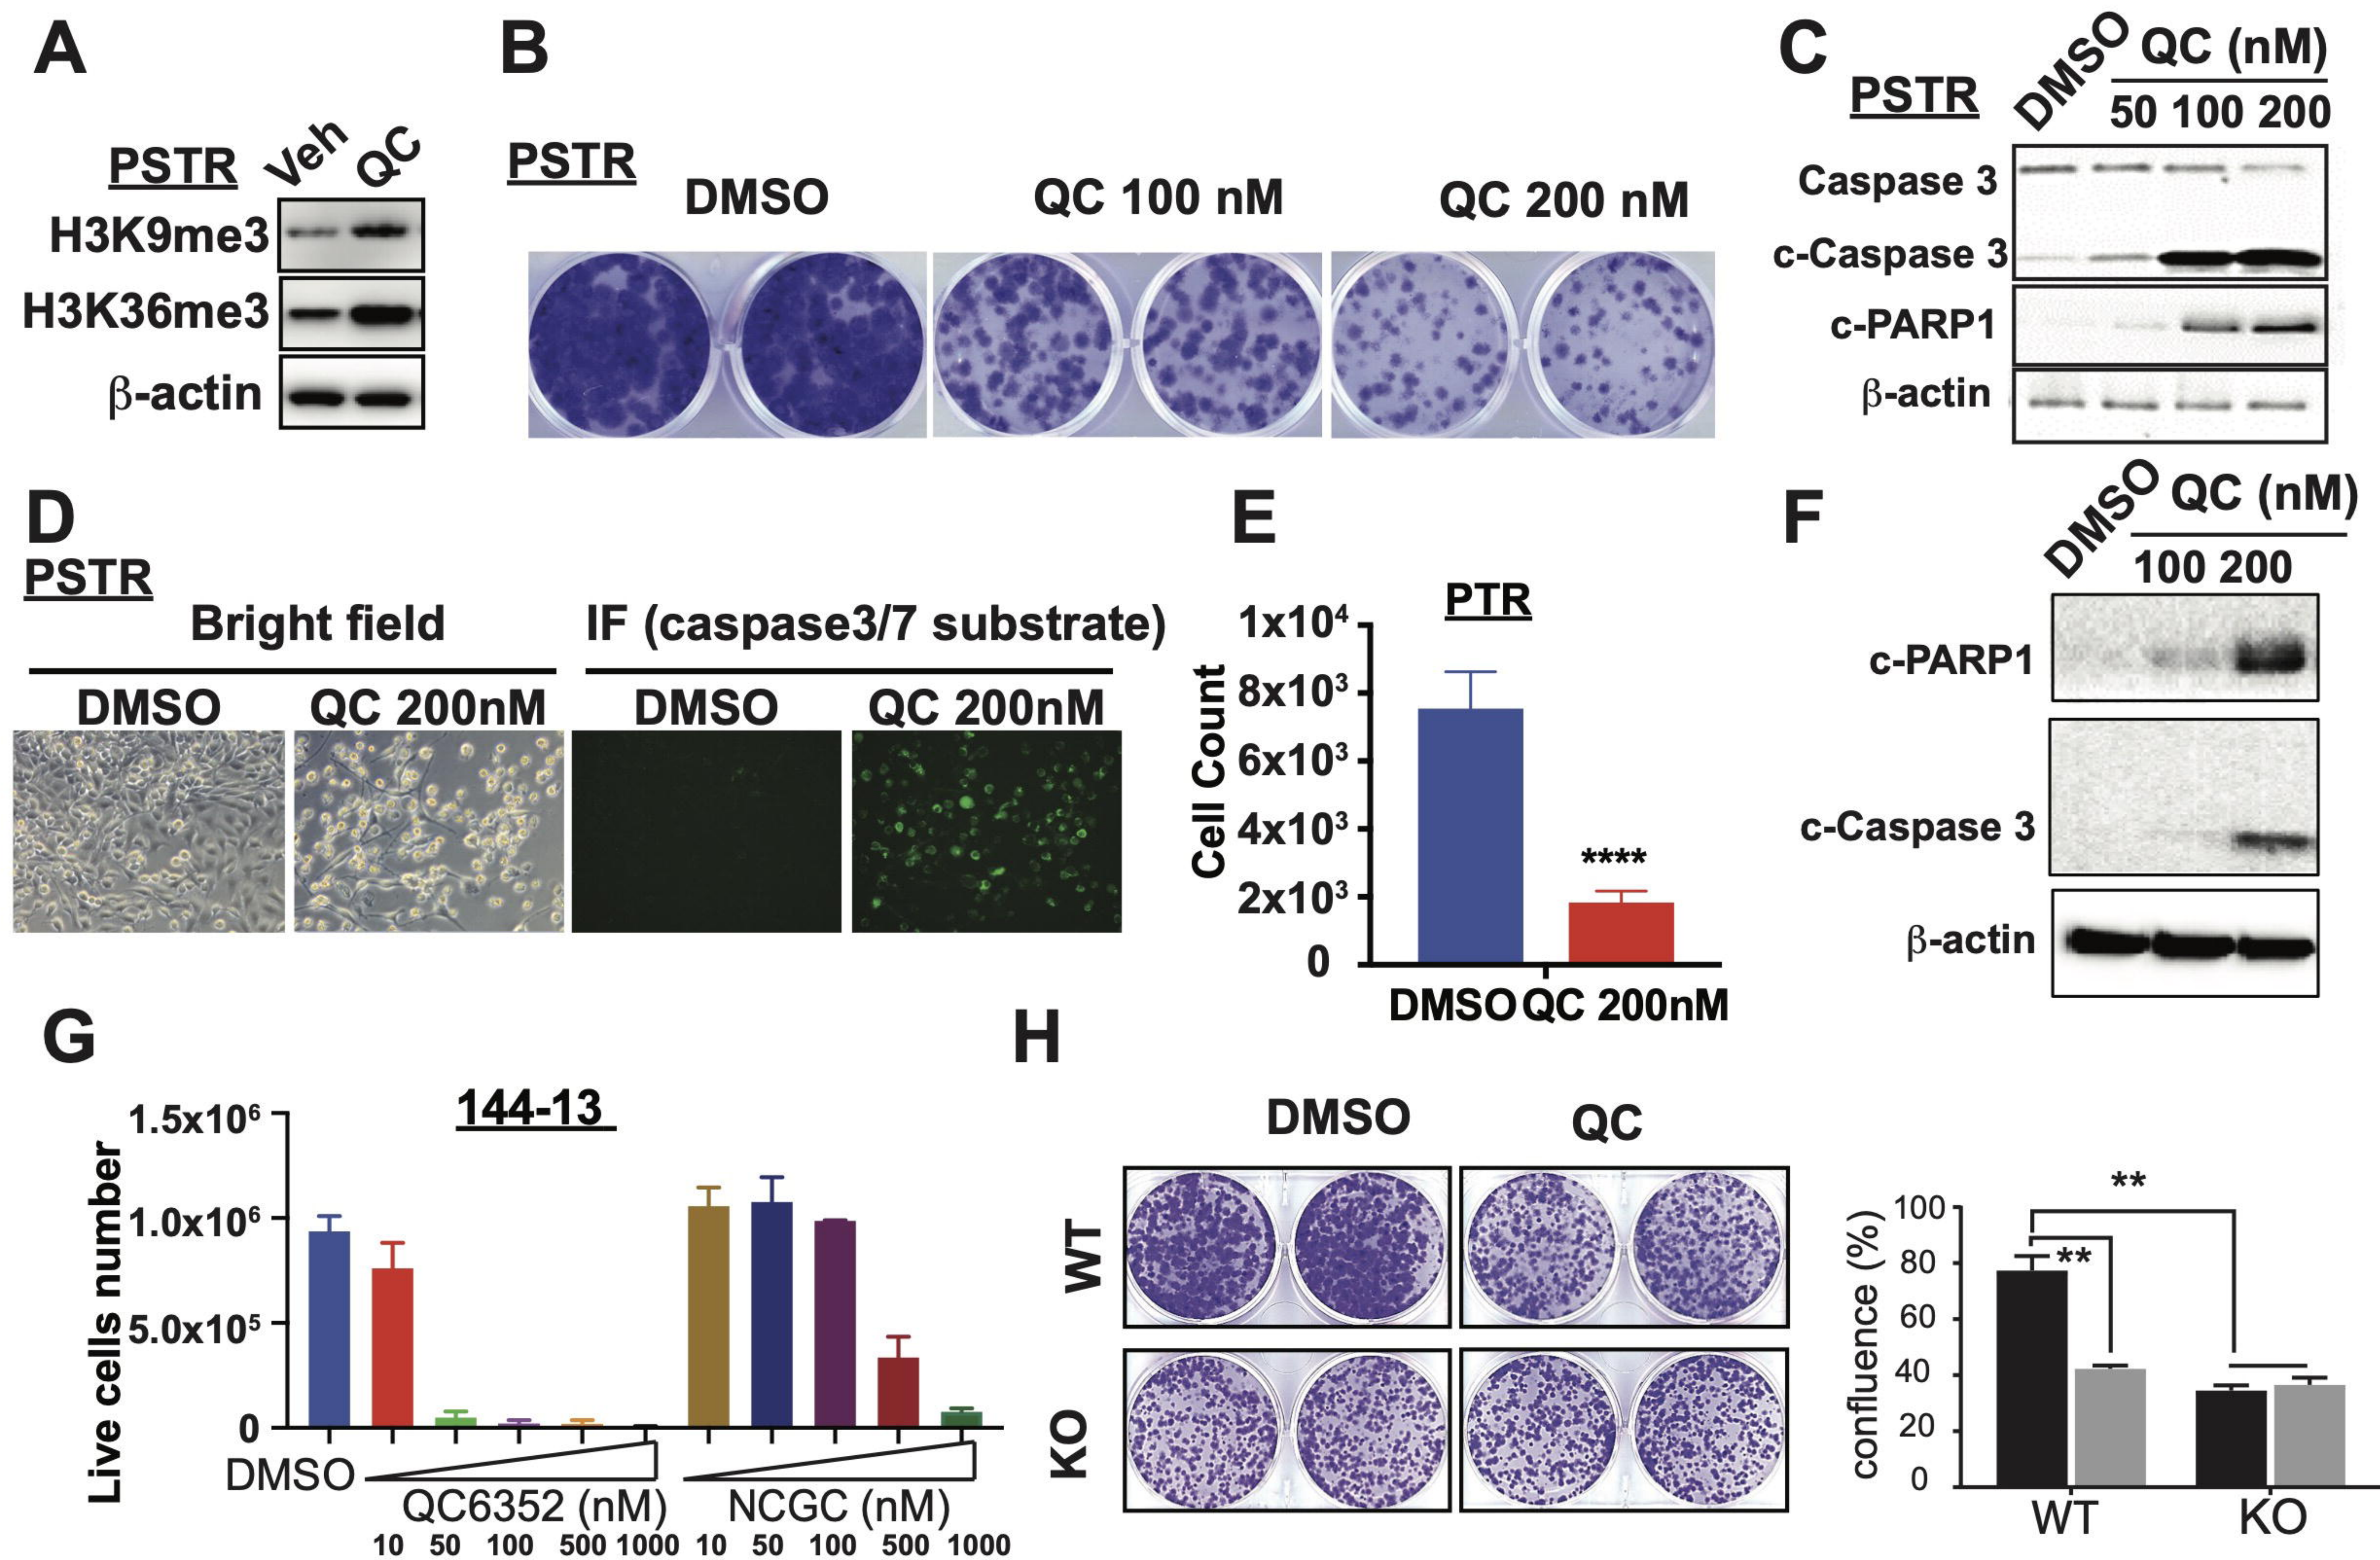



Figure 6

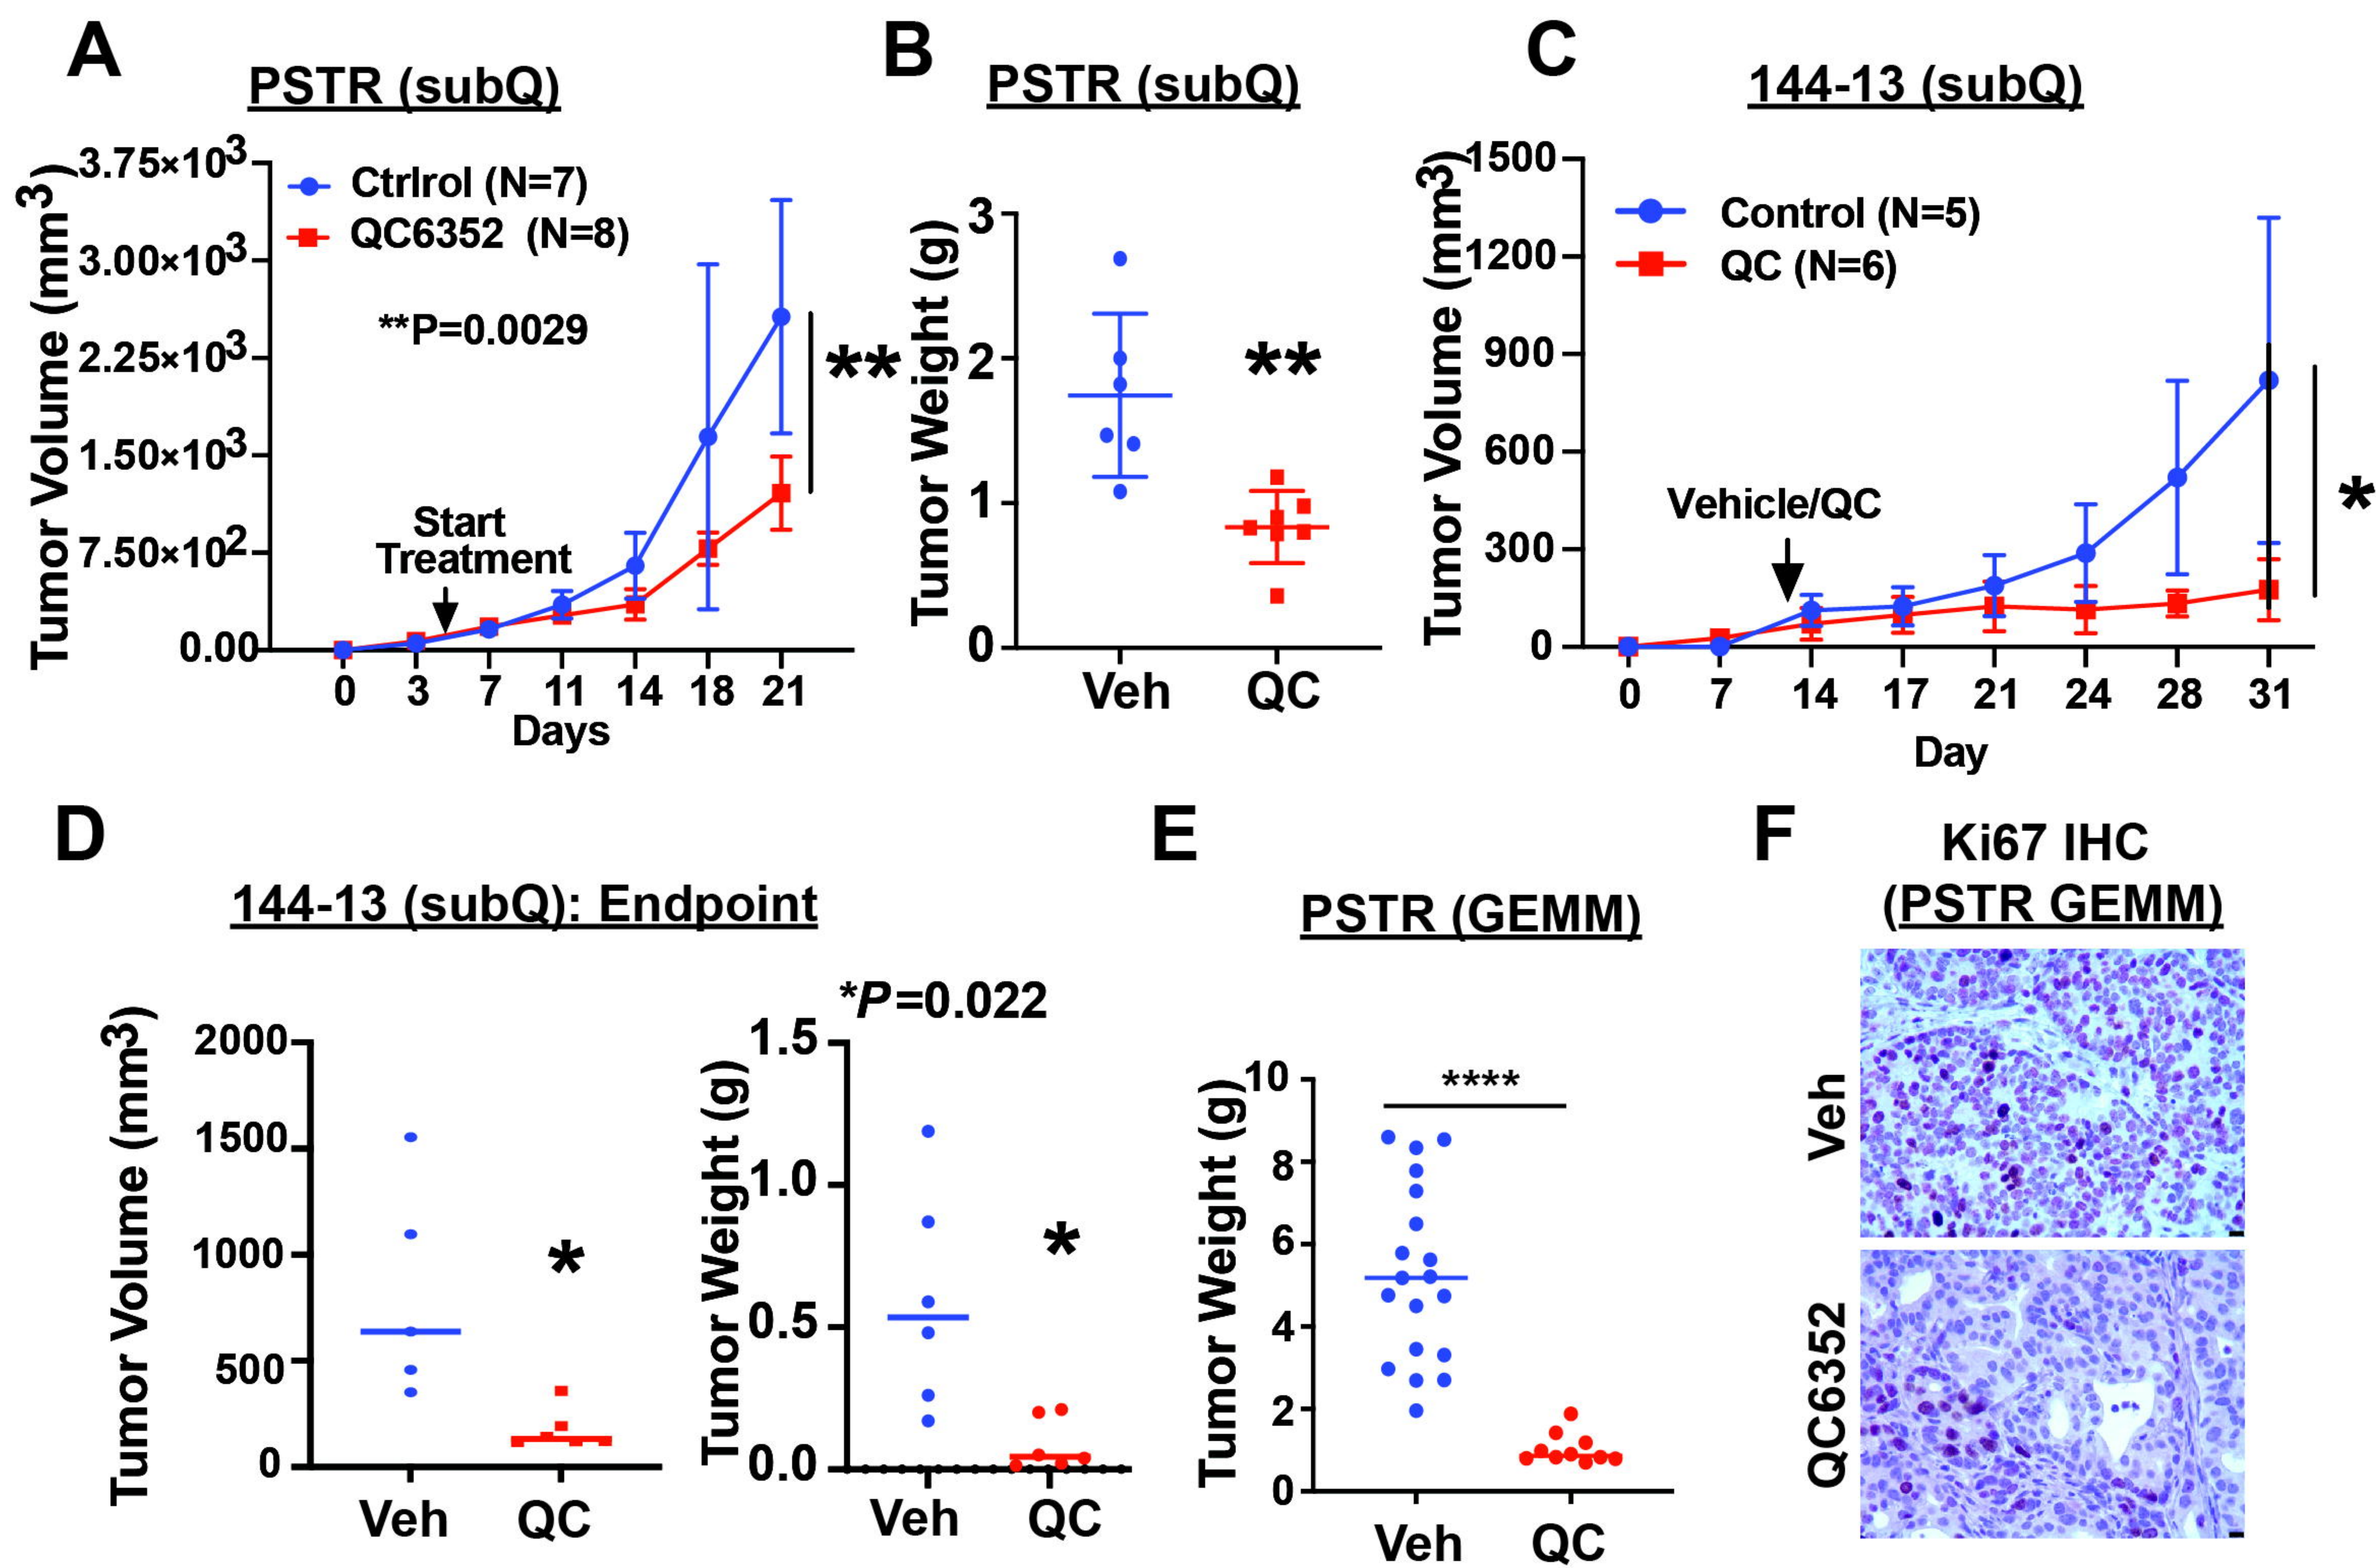

Source: https://www.biorxiv.org/content/10.1101/2022.05.14.491739v1.full.pdf
